1 **Discovery of a new class of reversible TEA-domain transcription factor inhibitors with a novel**  
2 **binding mode**

3 Lu Hu<sup>1,4\*</sup>, Yang Sun<sup>1,4,‡</sup>, Shun Liu<sup>2,4</sup>, Hannah Erb<sup>1</sup>, Alka Singh<sup>3</sup>, Junhao Mao<sup>3</sup>, Xuelian Luo<sup>2\*</sup>, Xu  
4 Wu<sup>1\*</sup>

5 <sup>1</sup>Cutaneous Biology Research Center, Massachusetts General Hospital, Harvard Medical School, 149,  
6 13th St., Charlestown, MA 02129, USA; <sup>2</sup>Departments of Pharmacology & Biophysics, University of  
7 Texas Southwestern Medical Center, 6001 Forest Park Rd., Dallas, TX 75390, USA. <sup>3</sup> Department of  
8 Molecular, Cell and Cancer Biology, University of Massachusetts Medical School, Worcester, MA  
9 01605, USA.

10

11 <sup>4</sup>These authors contributed equally to this work.

12 <sup>‡</sup>Present address: Cancer Institute, Xuzhou Medical University, Xuzhou, Jiangsu, China.

13 \*Correspondence: [LHU8@mgh.harvard.edu](mailto:LHU8@mgh.harvard.edu); [Xuelian.Luo@UTSouthwestern.edu](mailto:Xuelian.Luo@UTSouthwestern.edu);

14 or [XWU@CBRC2.mgh.harvard.edu](mailto:XWU@CBRC2.mgh.harvard.edu).

---

15 **ABSTRACT:** The TEA domain (TEAD) transcription factor forms a transcription co-activation  
16 complex with the key downstream effector of the Hippo pathway, YAP/TAZ. TEAD-YAP controls the  
17 expression of Hippo-responsive genes involved in cell proliferation, development, and tumorigenesis.  
18 Hyperactivation of TEAD-YAP activities is observed in many human cancers, and is associated with  
19 cancer cell proliferation, survival and immune evasion. Therefore, targeting the TEAD-YAP complex  
20 has emerged as an attractive therapeutic approach. We previously reported that the mammalian TEAD  
21 transcription factors (TEAD1-4) possess auto-palmitoylation activities and contain an evolutionarily  
22 conserved palmitate-binding pocket (PBP), which allows small molecule modulation. Since then,  
23 several reversible and irreversible inhibitors have been reported by binding to PBP. Here, we report a

24 new class of TEAD inhibitors with a novel binding mode. Representative analog TM2 shows potent  
25 inhibition of TEAD auto-palmitoylation both *in vitro* and in cells. Surprisingly, the co-crystal structure  
26 of the human TEAD2 YAP-binding domain (YBD) in complex with TM2 reveals that TM2 adopts an  
27 unexpected binding mode by occupying not only the hydrophobic PBP, but also a new side binding  
28 pocket formed by hydrophilic residues. RNA-seq analysis shows that TM2 potently and specifically  
29 suppresses TEAD-YAP transcriptional activities. Consistently, TM2 exhibits strong anti-proliferation  
30 effects as a single agent or in combination with a MEK inhibitor in YAP-dependent cancer cells. These  
31 findings establish TM2 as a promising small molecule inhibitor against TEAD-YAP activities and  
32 provide new insights for designing novel TEAD inhibitors with enhanced selectivity and potency.

---

### 33 **Introduction**

34 Yes-associated protein (YAP) and transcriptional coactivator with PDZ-binding motif (TAZ) are the  
35 major downstream effectors of the evolutionarily conserved Hippo pathway that controls organ size and  
36 tissue homeostasis (Pan, 2007; Yu et al., 2015). Beyond their critical roles in development, accumulating  
37 evidence shows that YAP/TAZ hyperactivation is frequently linked to tumorigenesis in a broad range of  
38 human cancers (Harvey et al., 2013; Pan, 2010; Zanconato et al., 2016b). Importantly, YAP/TAZ alone  
39 cannot interact with DNA, therefore, requires the binding of transcriptional factors TEA/TEF-domain  
40 (TEAD1–4 in mammals and Scalloped in *Drosophila*) to regulate the expression of Hippo-responsive  
41 genes (Wu et al., 2008; Zhao et al., 2008). The transcriptional targets of the TEAD-YAP/TAZ complex  
42 are involved in cell proliferation, cell survival, immune evasion and stemness (Moroishi et al., 2015).  
43 However, direct targeting YAP/TAZ with small molecules has been shown to be difficult. Therefore,  
44 pharmacological disruption of TEAD-YAP/TAZ has been considered as a promising avenue for cancer  
45 therapy (Holden and Cunningham, 2018; Johnson and Halder, 2014; Pobbati and Hong, 2020;  
46 Zanconato et al., 2016a).

47 One such strategy is to directly target TEAD-YAP interface with peptidomimetic inhibitors (Jiao et al.,  
48 2014; Zhang et al., 2014; Zhou et al., 2015). For instance, a peptide termed “Super-TDU” was designed  
49 to block the TEAD-YAP interaction (Jiao et al., 2014). “Super-TDU” mimics TDU domain of VGLL4  
50 which competes with YAP/TAZ for TEAD binding, and has been shown to suppress gastric cancer  
51 growth. However, peptide-based inhibitors generally suffer from poor cell permeability and  
52 pharmacokinetic properties, limiting their therapeutic applications. Since TEAD-YAP binding interface  
53 is shallow and spanning a large surface area, it is particularly challenging to optimize small molecules  
54 for desired potency.

55 Previously, we and others discovered that TEAD auto-palmitoylation plays an important role in  
56 regulation of TEAD stability and TEAD-YAP binding, and loss of TEAD palmitoylation leads to  
57 inhibition of TEAD-YAP transcriptional activities (Chan et al., 2016; Holden et al., 2020). More  
58 importantly, structural and biochemical studies illustrated that the lipid chain of palmitate inserts into a  
59 highly conserved deep hydrophobic pocket (Chan et al., 2016; Noland et al., 2016), away from TEAD-  
60 YAP interface, which is suitable for small molecule binding and suggests that lipid-binding allosterically  
61 regulates TEAD-YAP activities.

62 Over the past years, targeting TEAD auto-palmitoylation has emerged as an attractive strategy for  
63 fighting cancers with aberrant YAP activation. To date, several companies and academic research  
64 groups have developed small molecule inhibitors against TEAD-YAP activities. A non-steroidal anti-  
65 inflammatory drug, flufenamic acid (FA), has been shown to bind to the lipid-binding pocket of TEAD  
66 (Pobbati et al., 2015). Although FA lacks potency to block TEAD function, it demonstrates that the  
67 lipid-binding pocket could indeed accommodate small molecule binding. Ever since then, FA scaffold  
68 has been extensively explored by medicinal chemists to design TEAD inhibitors, including irreversible  
69 inhibitors TED-347 (Bum-Erdene et al., 2019), DC-TEADin02 (Lu et al., 2019), MYF-01-037 (Kurppa  
70 et al., 2020), K975 (Kaneda et al., 2020) as well as reversible inhibitor VT103 (Tracy T. Tang et al.,

71 2021). In comparison, non-FA based TEAD inhibitors are relatively limited, and only a few examples,  
72 such as compound 2, have been reported (Holden et al., 2020). Among the reported inhibitors, K975 and  
73 VT103 showed strong anti-proliferation effects *in vitro* and anti-tumor effects *in vivo*. However, these  
74 inhibitors only have effects in limited cell lines, such as *NF2*-deficient mesothelioma cells. In addition,  
75 most of the reported TEAD inhibitors are irreversible inhibitors targeting the cysteine at the  
76 palmitoylation site, which might have undesired non-specific reactivity towards other cysteines or other  
77 targets. To gain insights into the chemical diversity of reversible TEAD inhibitors and their utilities in  
78 cancer therapeutics, it is important to identify new chemical scaffolds to target TEADs.

79 We previously developed a non-FA based reversible TEAD inhibitor, MGH-CP1 (Li et al., 2020a),  
80 which inhibited transcriptional output of TEAD-YAP *in vitro* and *in vivo*. However, MGH-CP1 only  
81 showed sub-micromolar potency against TEAD palmitoylation *in vitro* and was used at low micromolar  
82 range in cellular assays. These limitations prompt us to develop new TEAD inhibitors with higher  
83 potency. In this study, we discovered a series of novel TEAD inhibitors featuring a common 4-benzoyl-  
84 piperazine-1-carboxamide scaffold. Among them, TM2 exhibits strong inhibition of TEAD2 and  
85 TEAD4 auto-palmitoylation *in vitro* with the IC<sub>50</sub> values of 156 nM and 38 nM, respectively. In  
86 addition, palmitoylation of both exogenous Myc-TEAD1 and endogenous Pan-TEADs is also  
87 significantly diminished by TM2 in HEK293A cells, which further confirms its potency and mode-of-  
88 action in cellular context. The co-crystal structure of TEAD2 YBD in complex with TM2 uncovered a  
89 novel binding mode of the compound, which extended into a previously unknown hydrophilic side  
90 pocket adjacent to the PBP, and caused extensive side chain rearrangements of the interacting residues.  
91 Further functional studies showed that TM2 significantly inhibits YAP-dependent liver organoid growth  
92 *ex vivo*, and inhibits proliferation of YAP-dependent cancer cells as a single agent or in combination  
93 with a MEK inhibitor. Overall, these studies broaden our understanding of the small molecule binding  
94 sites on TEADs.

## 95 **Results**

### 96 **Identification of TM2 as a novel TEAD auto-palmitoylation inhibitor**

97 To identify new chemotypes that could inhibit TEAD auto-palmitoylation, we screened a library  
98 containing about 30,000 non-proprietary medicinal chemistry compounds with three rounds of click-  
99 ELISA assay (Lanyon-Hogg et al., 2015), through the Astellas-MGH research collaboration by using the  
100 recombinant TEAD2 and TEAD4 YBD proteins. The inhibition of ZDHHC2 was used as a selectivity  
101 filter (**Figure 1-figure supplement 1**). We found several hits that share a common 4-(3-(2-  
102 cyclohexylethoxy)benzoyl)-piperazine-1-carboxamide moiety (data not shown, with micromolar  
103 potency in TEAD palmitoylation assays *in vitro*). The main variation is located at the *N*-substituent of  
104 the urea moiety with frequent incorporation of heteroarenes. Inspired by this structural convergence, we  
105 first designed a series of derivatives with variable substituents at the urea moiety, represented by TM2  
106 and TM22 (**Figure 1A**). TEAD2 auto-palmitoylation *in vitro* assay was used to evaluate their potency.  
107 Compared to heteroaryl group, phenyl substituent showed stronger inhibition on TEAD2 auto-  
108 palmitoylation (TM2 vs. TM22, **Figure 1B**). Inspired by these results, we explored the tolerance level  
109 by increasing hydrophilicity of TM2. As illustrated by TM45 and TM98, hydrophilic groups at the left  
110 cyclohexyl ring significantly decrease the activities, while the phenyl moiety at the right-side of the urea  
111 moiety is well tolerated (TM112, **Figure 1B**). Overall, TM2 was identified as the most potent compound  
112 (**Figure 1B**) and selected for further biological evaluations.

113 TEAD family consists of four homologous members, TEAD1-4, which share highly conserved  
114 domain architectures (Pobbati and Hong, 2013). We found that TM2 inhibits TEAD2 palmitoylation  
115 with an IC<sub>50</sub> value of 156 nM (**Figure 1C**). Encouragingly, TM2 displays an even more potent effect on  
116 TEAD4 auto-palmitoylation with an IC<sub>50</sub> of 38 nM (**Figure 1D**). To study its effects on cellular TEAD  
117 palmitoylation, we overexpressed Myc-TEAD1 in HEK293A cells and treated with TM2 at different  
118 doses. As **Figure 1E** shows, TM2 dramatically suppresses Myc-TEAD1 palmitoylation in cells in a

119 dose-dependent manner. Furthermore, treatment of TM2 also significantly inhibits endogenous TEAD1-  
120 4 palmitoylation using an antibody recognizing pan-TEADs (**Figure 1F**). Even at as low as 100 nM,  
121 Pan-TEAD palmitoylation was diminished. Collectively, these results suggested that TM2 is a potent  
122 and pan-inhibitor of palmitoylation of TEAD family proteins.

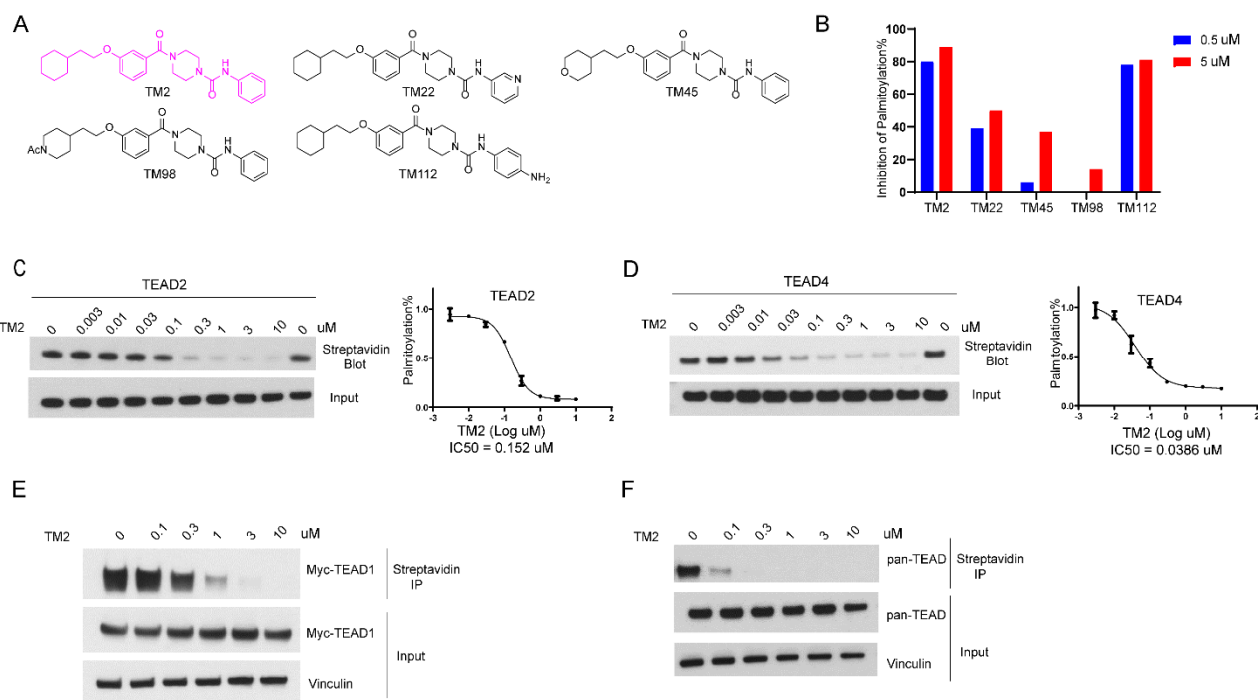

123

124 **Figure 1.** Identification of TM2 and analogues as novel TEAD auto-palmitoylation inhibitors. (A)  
125 Representative chemical structures of a novel class of TEAD inhibitors with 4-(3-(2-  
126 cyclohexylethoxy)benzoyl)-piperazine-1-carboxamide moiety. TM2 structure is highlighted in magenta.  
127 (B) Inhibition of TEAD2 auto-palmitoylation with treatment of TM2 under 0.05 and 0.5  $\mu$ M for 30  
128 mins, respectively. IC<sub>50</sub> values for TM2 inhibition of TEAD2 (C) and TEAD4 (D) auto-palmitoylation  
129 were characterized by western blot analysis (left) and quantified by Image J (right). The data was  
130 determined by independent replicates (n=3), and shown as mean  $\pm$  SEM. Palmitoylation of Myc-  
131 TEAD1 (E) and endogenous pan-TEAD (F) were analyzed by immunoprecipitation assay with  
132 treatment of TM2 at indicated concentrations for 24 h.

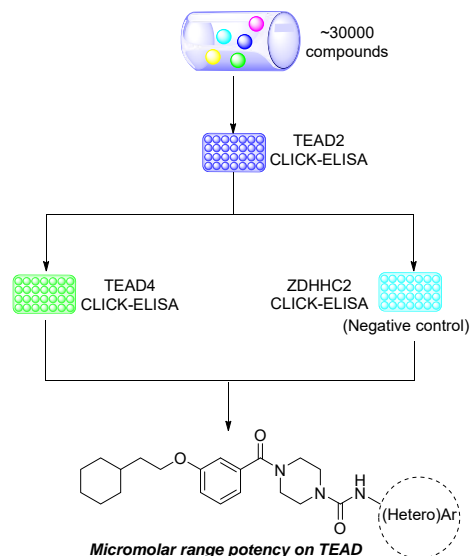

133

134 **Figure 1-figure supplement 1.** Scheme for High through-put screening of TEAD inhibitors

135

136 **TM2 adopts a novel binding mode compared to other known TEAD inhibitors**

137 To gain insights into the precise binding mode of TM2, we determined the co-crystal structure of  
138 TEAD2 YBD in complex with TM2 at 2.4 Å resolution (**Figure 2, Figure 2-figure supplement 1 and**  
139 **supplement Table 1**). Overall, TM2 binds to the same PBP in TEAD2 where palmitic acid and other  
140 inhibitors target. As shown in **Figure 2B**, the (2-cyclohexylethoxy)phenyl moiety of TM2 is surrounded  
141 by several hydrophobic residues, such as F233, L383, L390, F406, I408, Y426, and F428, enabling  
142 strong hydrophobic interactions, which is very similar to the interaction mode of TEAD with the fatty  
143 acyl chain of palmitic acid.

144 However, by superposing the TEAD2-TM2 (PDB 8CUH) with TEAD2-PLM structures (PDB 5HGU)  
145 (Chan et al., 2016), we observed a new feature of TM2 binding (**Figure 2B**). Unlike palmitic acid with  
146 its head group pointing towards residue C380, the urea moiety of TM2 exhibits a completely different  
147 orientation and sticks into a new side pocket, which has never been reported before to be involved in  
148 TEAD inhibitor binding and is only accessible by rearranging the side chains upon TM2 binding

149 (**Figure 2B and Figure 2-figure supplement 1A**). TM2 binding drives significant conformational  
150 changes in the side chains of residues C343 and L374, which makes space for TM2 insertion (**Figure**  
151 **2C**). Additionally, TM2 binding causes the side chain movement in residue Q410 and Y333, which  
152 reduces the distance between the nitrogen atom of Q410 and the oxygen atom of Y333 from 4.9 Å to 2.7  
153 Å to allow the formation of favorable electrostatic interaction (**Figure 2C**).

154 This binding model is highly consistent with our structure-activity relationship (SAR) results in  
155 **Figure 1A-B** that demonstrate that the left hydrophobic tail is repulsive to incorporate hydrophilicity,  
156 while the urea moiety is tolerated. The surface electrostatics of the TM2 binding pocket (**Figure 2-**  
157 **figure supplement 1A**) also illustrated that the (2-cyclohexylethoxy)phenyl moiety inserts into a nearly  
158 neutral environment, while the urea is buried in a pocket bearing electronegative properties.  
159 Furthermore, the electronegative carbonyl which links benzene and piperazine is spatially adjacent to  
160 electropositive electrostatics.

161 We then set to figure out whether this unexpected binding model is unique to TM2, compared to other  
162 TEAD inhibitors. The co-crystal structures of TEAD YBD in complex with PLM (PDB 5HGU), TM2  
163 (PDB 8CUH), and other known TEAD inhibitors, including MGH-CP1 (PDB 6CDY) (Li et al., 2020a),  
164 K975 (PDB 7CMM) (Kaneda et al., 2020) and VT105 (PDB 7CNL) (Tracy T. Tang et al., 2021), were  
165 superposed (**Figure 2D and Figure 2-figure supplement 1B and 1C**). Although PLM and these TEAD  
166 inhibitors are co-crystallized with different members of TEAD family of proteins, the highly  
167 homologous structures of TEAD YBD allowed us to compare their binding modes. Consistent with  
168 previously reported results, MGH-CP1, VT105 or K975 adopts almost the same binding mode as PLM  
169 and fits very well with the PBP. However, the scenario depicted by TM2 is quite different, which  
170 provides new insights into the structural adaptability for development of TEAD inhibitors. Considering  
171 relatively higher hydrophilicity in the new side pocket, there will be much more space to balance the



172 lipophilicity of TEAD inhibitors and improve drug-like properties, such as solubility and metabolism  
173 (Waring, 2010).

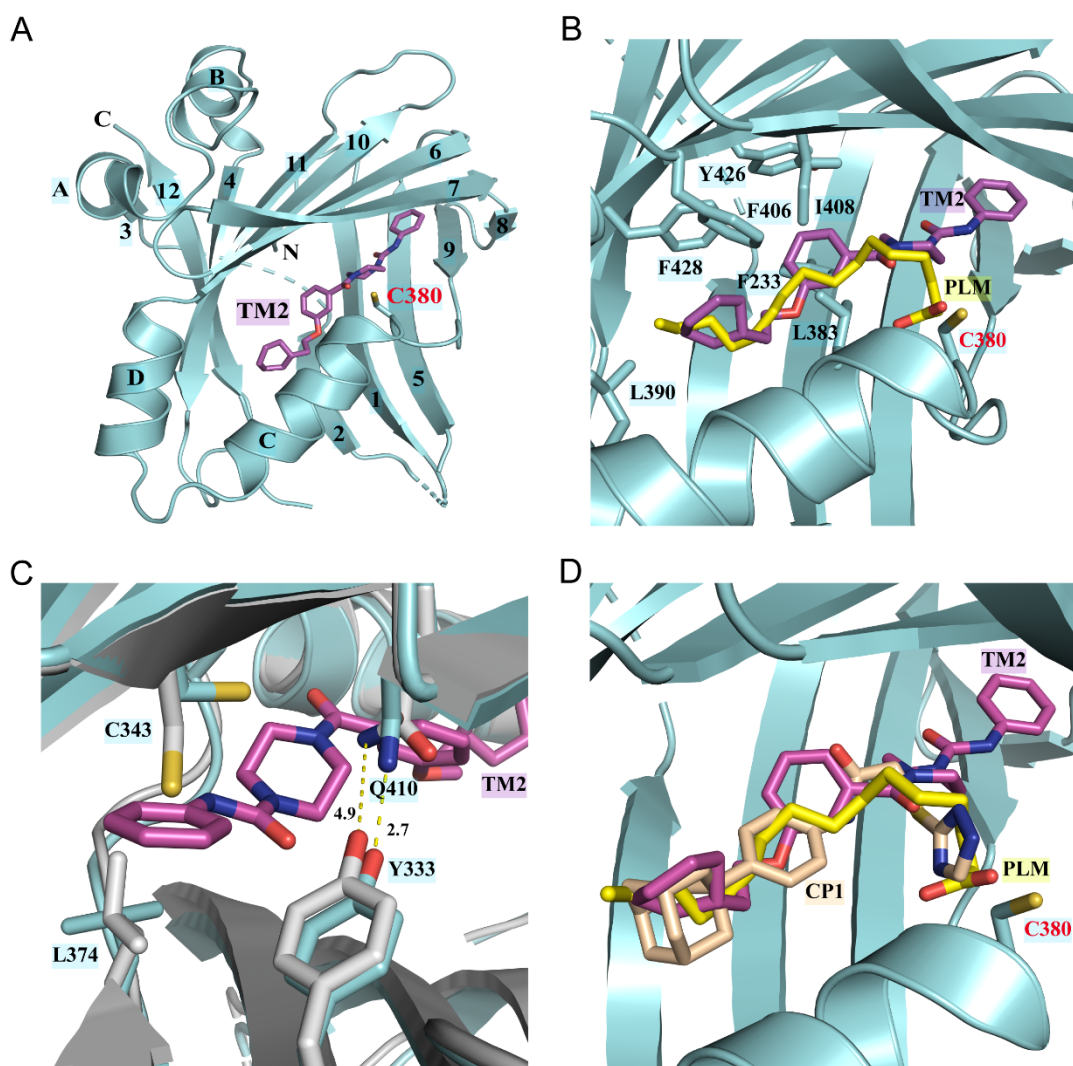

174

175 **Figure 2.** Co-crystal structure of TEAD2 complexed with TM2. (A) Ribbon diagram of the crystal  
176 structure of TEAD2-TM2 (PDB 8CUH). TM2 is shown as magenta sticks. (B) Close-up view of the  
177 TM2 binding site of TEAD2 (PDB 8CUH) with the superposition of the TEAD2-PLM structure (PDB  
178 5HGU). Surrounding residues are shown as cyan sticks. PLM is shown as yellow sticks. (C)  
179 Conformational changes in side chains of residues in the new pocket in the presence of TM2 binding.  
180 Indicated residues from TEAD2-TM2 and TEAD2-PLM are shown as cyan and gray sticks, respectively.  
181 Distances between atoms are shown with yellow dash lines and the unit is angstrom. (D) Structural

182 superposition of TEAD2-TM2 (PDB 8CUH), TEAD2-PLM (PDB 5HGU), and TEAD2-CP1(PDB  
183 6CDY). TEAD2 is shown as cyan ribbon. TM2, PLM, and CP1 are shown as sticks and colored in  
184 magenta, yellow, and wheat, respectively. PLM, Palmitic acid.

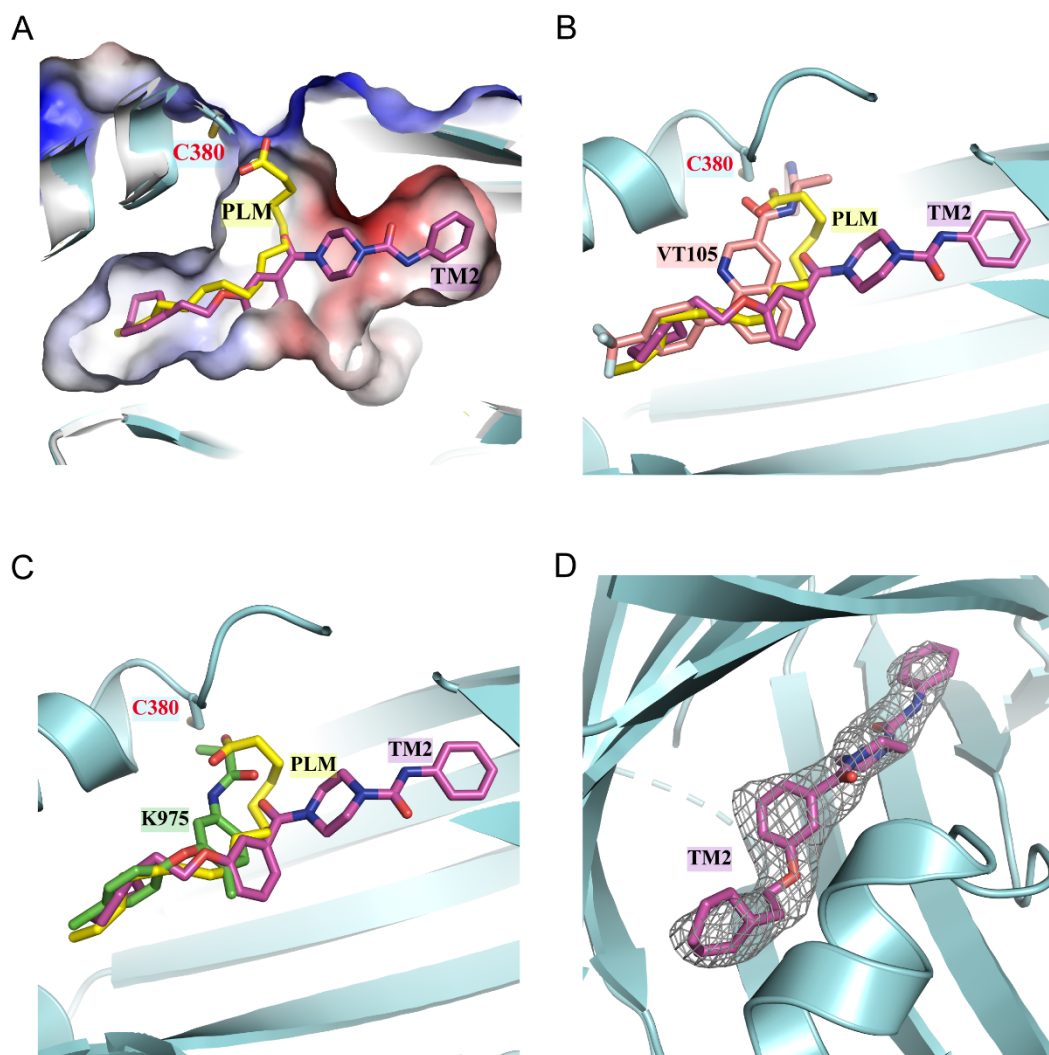

185

186 **Figure 2-figure supplement 1.** (A) Comparison of orientations of TM2 and PLM in the binding pocket.  
187 The TEAD2 protein is shown in cyan ribbon. The pocket is shown by surface. PLM and TM2 are shown  
188 as sticks and colored in yellow and magenta, respectively. (B) Structural superposition of TEAD2-TM2  
189 (PDB 8CUH), TEAD2-PLM (PDB 5HGU), and TEAD3-VT105 (PDB 7CNL). TM2, PLM, and VT105  
190 are shown as sticks and colored in magenta, yellow, and salmon, respectively. (C) Structural  
191 superposition of TEAD2-TM2 (PDB 8CUH), TEAD2-PLM (PDB 5HGU), and TEAD1-K975 (PDB

192 7CMM). TM2, PLM, and K975 are shown as sticks and colored in magenta, yellow, and green,  
193 respectively. (D) The  $F_O - F_C$  omit electron density map for TM2 at the contour level of  $2.5 \sigma$  is shown  
194 in gray. The TEAD2 protein is shown in cyan ribbon and TM2 is shown as magenta sticks.

| <b>TEAD2-TM2</b>             |                        |
|------------------------------|------------------------|
| <b>Data collection</b>       |                        |
| Wavelength (Å)               | 0.979                  |
| Resolution (Å <sup>2</sup> ) | 50.00-2.40 (2.44-2.40) |
| Space group                  | C2                     |
| Unit cell dimensions         |                        |
| $a, b, c$ (Å)                | 124.07, 62.29, 79.91   |
| $\alpha, \beta, \gamma$ (°)  | 90.0, 117.7, 90.0      |
| Redundancy                   | 3.6 (2.8)              |
| Completeness (%)             | 97.0 (83.7)            |
| Reflections (unique)         | 20, 774                |
| $I/\sigma_I$                 | 24.1 (1.5)             |
| $R_{\text{sym}}$ (%)         | 5.2 (68.0)             |
| $R_{\text{pim}}$ (%)         | 3.1 (45.6)             |
| $CC_{1/2}$ <sup>a</sup>      | 0.720                  |
| <b>Refinement</b>            |                        |
| No. of non-hydrogen atoms    | 3, 393                 |
| Protein                      | 3, 299                 |
| Ligand                       | 64                     |
| Water                        | 30                     |

|                                                         |                 |
|---------------------------------------------------------|-----------------|
| Average <i>B</i> factor (Å <sup>2</sup> )               | 48.9            |
| Protein                                                 | 49.0            |
| Ligand                                                  | 47.2            |
| Water                                                   | 42.7            |
| <i>R</i> <sub>work</sub> / <i>R</i> <sub>free</sub> (%) | 18.38/23.46     |
| RMSDs                                                   |                 |
| Bond length (Å)                                         | 0.008           |
| Bond angle (°)                                          | 1.099           |
| Favored/allowed/outliers (%)                            | 92.75/7.25/0.00 |

195 Values for the highest resolution shell are given in parentheses.

196 <sup>a</sup>CC<sub>1/2</sub> values shown are for the highest resolution shell.

197 **Figure 2- supplement Table 1.** Data collection and structure refinement statistics.

198

## 199 **TM2 inhibits TEAD-YAP association and TEAD-YAP transcriptional activity**

200 TEAD auto-palmitoylation plays important roles in regulation of TEAD-YAP interaction. To confirm  
201 whether TM2 functions through blockade of TEAD-YAP binding, we tested TM2 in a malignant pleural  
202 mesothelioma (MPM) cell line H226 cells, which is deficient with NF2 and highly dependent on TEAD-  
203 YAP activities (Kaneda et al., 2020; Tracy T Tang et al., 2021). YAP co-immunoprecipitation (IP)  
204 experiments indicated that TM2 dramatically blocked the association of YAP with endogenous TEAD1  
205 as well as pan-TEAD in a dose-dependent manner (**Figure 3A**). Next, we evaluated the effects of TM2  
206 in the expressions of TEAD-YAP target genes, represented by *CTGF*, *Cyr61* and *ANKDR1*. After  
207 treatment of TM2, the expression levels of *CTGF* and *ANKDR1* were significantly suppressed at both 24  
208 and 48 h, while *Cyr61* show strong response at 48h (**Figure 3B and Figure 3-figure supplement 1**).

209 In order to systemically evaluate the effect of TM2 on YAP/TAZ-TEAD transcriptional activation, we  
210 performed RNA-seq analysis (**Figure 3C**). YAP/TAZ-dependent H226 cells were treated with or  
211 without TM2. We performed principle component analysis (PCA), a mathematical algorithm reducing  
212 the dimensionality of the data while retaining most of the variation in the data sets. The samples were  
213 plotted and indicated that TM2 treatment substantially altered the gene sets at PC1 in H226 cells  
214 (**Figure 3D**). Gene set enrichment analysis (GSEA) was performed to analyze the transcriptional  
215 signature gene sets from Molecular Signature Database. It showed that YAP signature was the top  
216 enriched signature according to the Normalized Enrichment Score (NES) (**Figure 3E**). To further  
217 validate the effects of TM2 on YAP/TAZ signaling, the Corderonsi\_YAP\_conserved\_Signature and  
218 YAP\_TAZ-TEAD Direct Target Genes were determined (Zanconato et al., 2015). Consistently,  
219 YAP/TAZ signature was significantly enriched in downregulation phenotype in both of gene sets  
220 (**Figure 3F**). We then compared the specificity of TM2 with that of irreversible TEAD inhibitor K975  
221 which showed strong antitumor effects in H226 xenograft tumor. Through global analysis of YAP/TAZ-  
222 TEAD direct target genes in H226 xenograft tumor treated with three doses of K975 (p.o.) and H226  
223 cells treated with 1 $\mu$ M TM2 (Kaneda et al., 2020; Zanconato et al., 2015), we found that TM2 was more  
224 efficient to block YAP/TAZ-TEAD target genes relative to K975 in H226 xenograft tumors (**Figure 3-**  
225 **figure supplement 2**), highlighting the high specificity of our reversible inhibitors. Taken together, we  
226 identified TM2 as a potent disruptor that can specifically attenuate outputs of Hippo pathway.

### 227 **TM2 inhibits YAP-dependent organoids growth and cancer cell proliferation**

228 YAP activity has been shown to be critical for the growth of liver organoid (Planas-Paz et al., 2019).  
229 Therefore, we used mouse hepatic progenitor *ex vivo* organoids to further investigate the effects of TM2  
230 in a physiologically relevant model. As shown in **Figure 4A**, TM2 impaired the sustainability of  
231 organoids growth in a dose dependent manner, with more than 85% of disruption at 40 nM.

232 Consistently, Ki67 positive cells for organoids maintenance in 3D culture were significantly diminished  
 233 upon TM2 treatment (**Figure 4B** and **Figure4-figure supplement 1**).

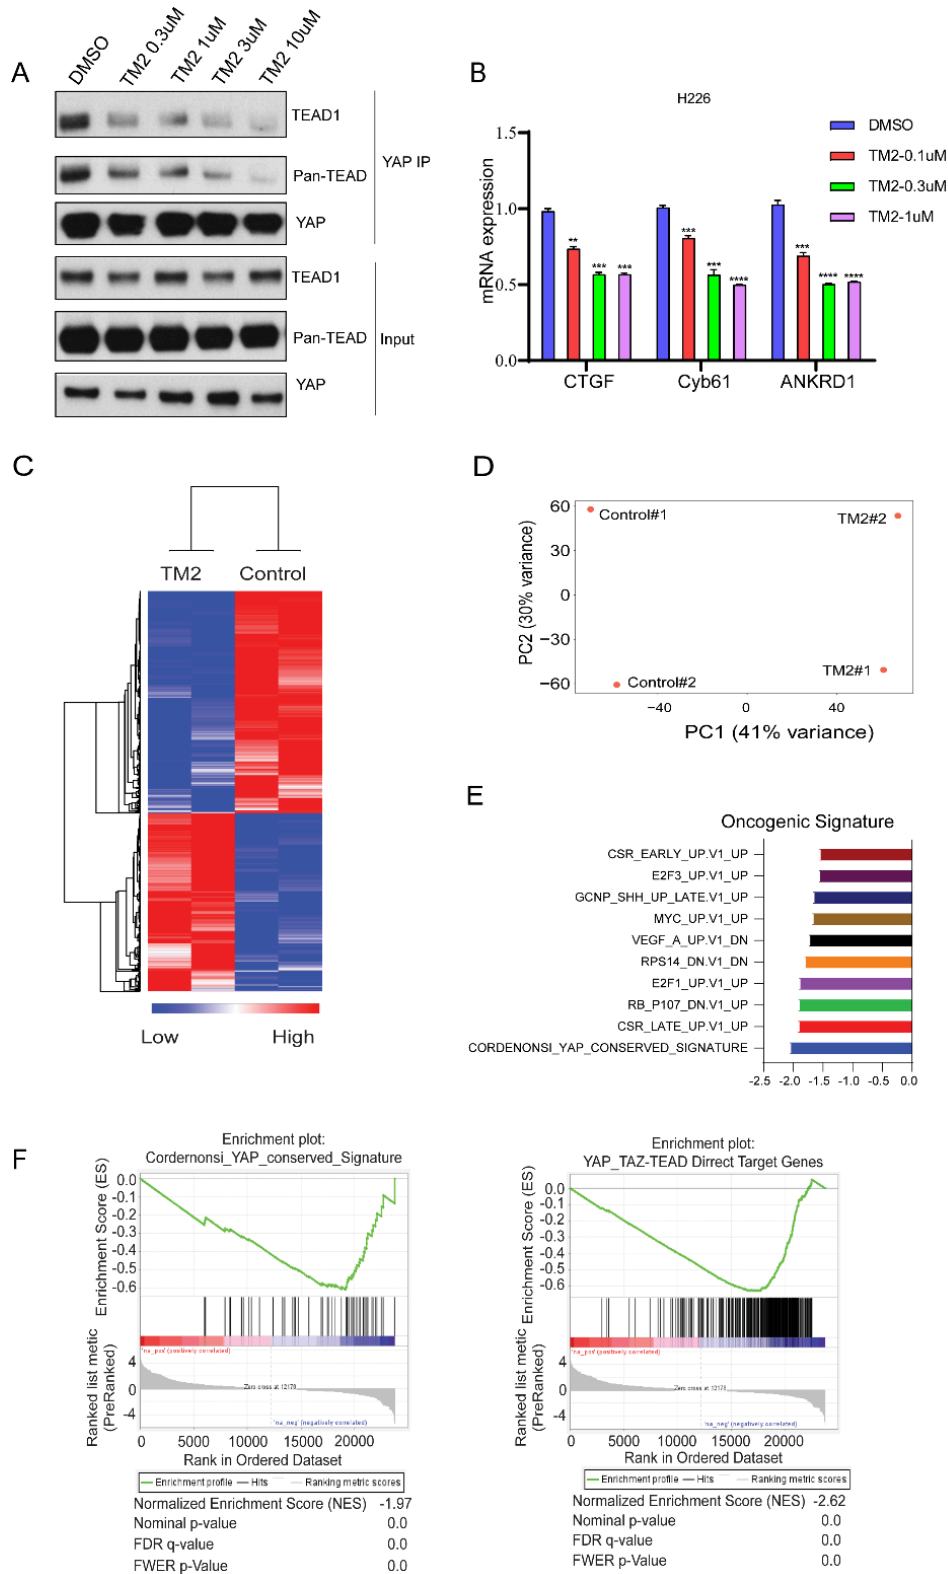

234

235 **Figure 3.** TM2 suppressed transcriptional outputs of Hippo pathway in cancer cells. (A) H226 cells  
236 were treated with TM2 at indicated concentrations for 24 h. The interactions of YAP and Pan-TEAD as  
237 well as TEAD1 was observed with YAP Co-IP. (B) representative target genes of Hippo pathway in  
238 H226 cells were measured with treatment of TM2 at indicated concentrations for 48 h. The data was  
239 determined by independent triplicates (n=3) and shown as mean  $\pm$  SEM. Significance was determined  
240 by two-tailed t-test. \*\* $P < 0.01$ , \*\*\* $P < 0.001$ , \*\*\*\* $P < 0.0001$ . (C) Heatmap analysis of global genes  
241 transcriptional alteration in H226 treated with vehicle control or TM2. (D) PCA biplot with genes  
242 plotted in two dimensions using their projections onto the first two principal components, and 4 samples  
243 (Control 2 samples, TM2 2 samples) plotted using their weights for the components. (E) Gene set  
244 enrichment analysis of H226 cells treated with TM2 using oncogenic signature gene sets from  
245 Molecular Signatures Database. (F) Gene set enrichment plot of  
246 Corderonsi\_YAP\_conserved\_Signature (left panel) and YAP\_TAZ-TEAD Direct Target Genes (right  
247 panel) with H226 cells treated with TM2.

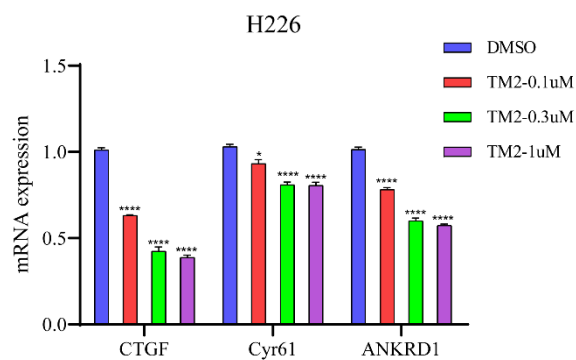

248

249 **Figure 3-figure supplement 1.** Target gene expression in H226 with TM2 treatment for 24 h. The data  
250 was determined by independent triplicates (n=3) and shown as mean  $\pm$  SEM. Significance was  
251 determined by two-tailed t-test. \* $P < 0.05$ , \*\*\*\* $P < 0.0001$ .

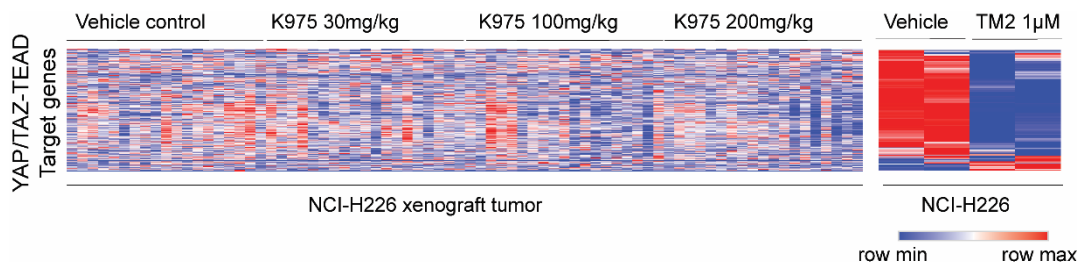

252

253 **Figure 3-figure supplement 2.** Heatmap analysis of YAP/TAZ-TEAD direct target genes transcriptional  
254 alteration in H226 xenograft tumor treated with K975 (GSE196726) and H226 cell line treated with  
255 TM2 (1µM).

256

257 Pleural mesothelioma (MPM) is a type of aggressive tumor, associated with exposure to asbestos  
258 fibers (Rossini et al., 2018). Despite several standard therapies, such as surgery, radiotherapy,  
259 chemotherapy and

260 immunotherapies, MPM patients still suffer poor prognosis with a median survival of only 8–14 months  
261 (Nicolini et al., 2020). *NF2* and *LATS2*, the upstream components of Hippo pathway, are frequently

262 observed to be inactivated in malignant mesothelioma (MM), leading YAP activation in more than 70%  
263 of analyzed primary MM tissues (Murakami et al., 2011; Sekido, 2018). Therefore, MM would be a

264 good model to study the therapeutic effects of TM2 on Hippo signaling defective cancers. Encouraged  
265 by the strong inhibition of TEAD-YAP transcriptional activities in H226 cells, we first evaluated anti-

266 proliferative activities of TM2 in this cell line. As shown in **Figure 4C**, H226 cells exhibited striking  
267 vulnerability to TM2 treatment with an  $IC_{50}$  value of 26 nM, consistent with its potency in blocking

268 TEAD palmitoylation in vitro and in cells. Other derivatives, including TM22, TM45, TM98, TM112  
269 are less potent as TM2, which correlated well with their *in vitro* activities (**Figure 4C**). In addition, we

270 also studied the effects of TM2 in two other MPM cell lines, MSTO-211H and NCI-H2052, which  
271 harbors *Lats1/2* deletion/mutations, and *NF2*-deficiency, respectively (Kaneda et al., 2020; Lin et al.,

272 2017; Miyanaga et al., 2015). Consistently, TM2 also significantly inhibits cell proliferation of MSTO-



273 211H and NCI-H2052 cells (**Figure 4D**) with IC<sub>50</sub> values of 94 nM and 157 nM, respectively. In  
 274 comparison, TM2 shows no significant inhibition in the Hippo WT mesothelioma cells, NCI-H28 with  
 275 IC<sub>50</sub> >5 μM (Tanaka et al., 2013) (**Figure 4D**), suggesting TM2 is specific to YAP-activated cancer  
 276 cells.

277

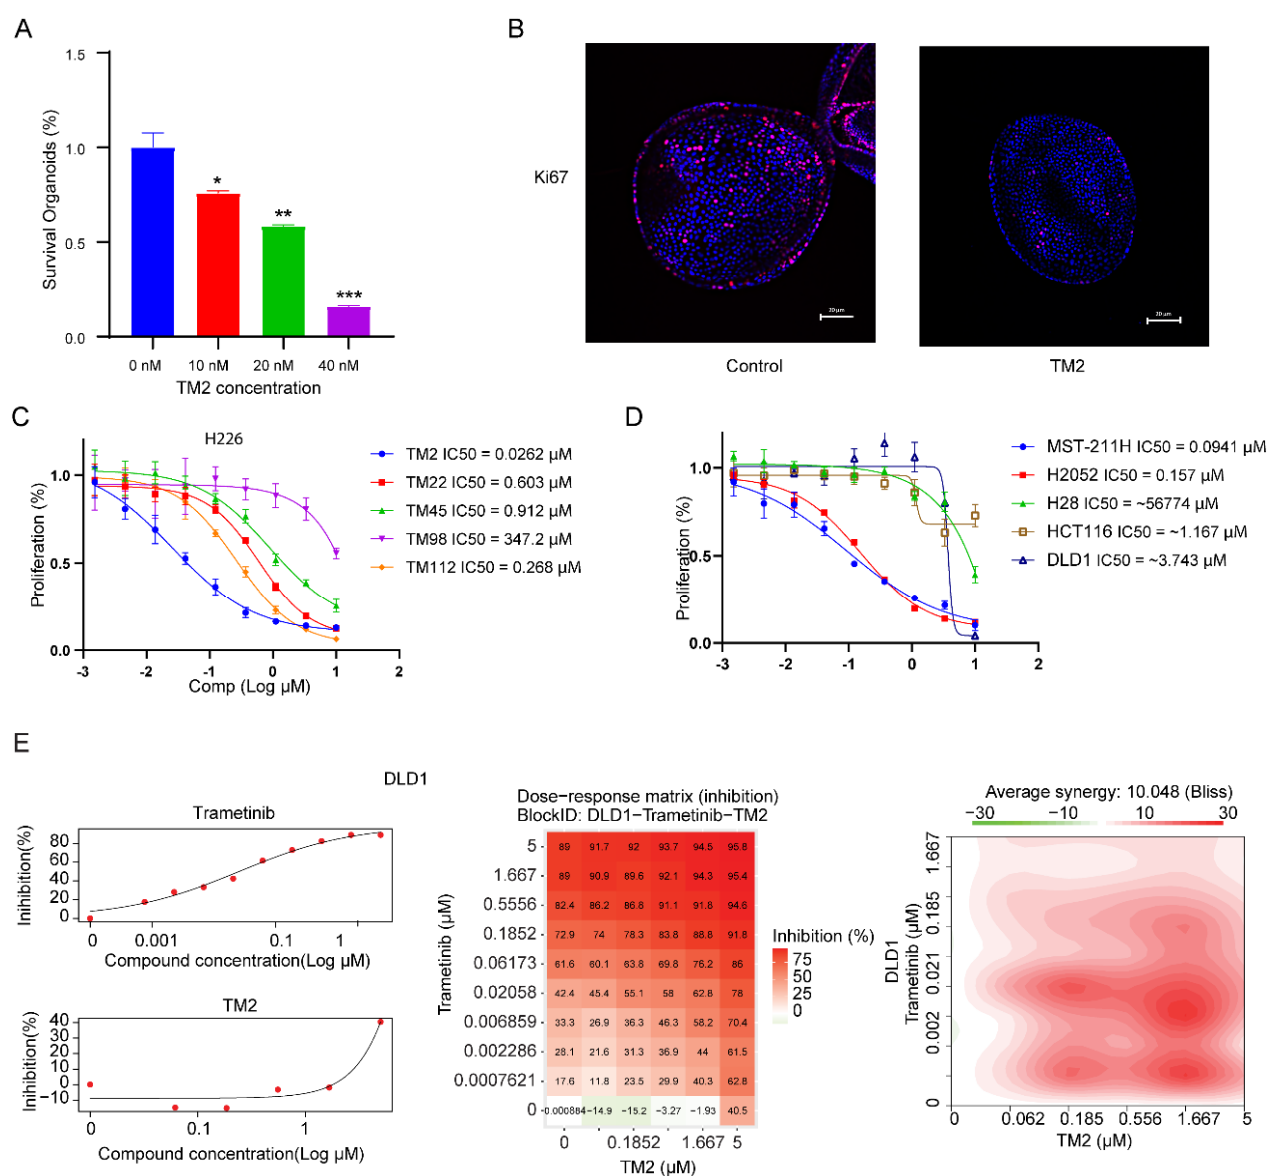

278

279 **Figure 4.** TM2 showed inhibition on YAP dependent proliferation. (**A**) Percentages of survival  
 280 organoids with treatment of control or TM2 at indicated concentrations. The data was determined by  
 281 independent triplicates (n=3) and shown as mean ± SEM. Significance was determined by two-tailed t-

282 test. \* $P < 0.05$ , \*\* $P < 0.01$ , \*\*\* $P < 0.001$  **(B)** Immunofluorescent staining of Ki67 in organoids treated  
283 with control or TM2 (40 nM). Pink, Ki-67; blue, nuclear DNA (DAPI). Bar, 20  $\mu\text{m}$ . **(C)** Cell inhibition  
284 in H226 cells with treatment of compounds at indicated concentrations for 6 days. The data was  
285 determined by independent triplicates (n=3) and shown as mean  $\pm$  SEM. **(D)** Cell inhibition in MSTO-  
286 211H, H2052, H28, HCT116 and DLD1 cells with treatment of TM2 at indicated concentrations for 5,  
287 7, 6, 5, or 5 days, respectively. The data was determined by independent triplicates (n=3) and shown as  
288 mean  $\pm$  SEM. **(E)** Drug combination experiments using TM2 and MEK inhibitor Trametinib in DLD1:  
289 Heatmaps show color-coding as percentage of cell viability normalized to untreated controls. Heatmaps  
290 of Bliss score for TM2 and Trametinib combination were shown.

291

292 Currently, TEAD inhibitors mainly show promising therapeutic potentials in mesothelioma, with  
293 limited activities in other YAP-dependent cancer cells. Given that deregulated Hippo signaling is  
294 implicated in many human cancers (Harvey et al., 2013), it is important to test the efficacy of TEAD  
295 inhibitors in cancers beyond mesothelioma, which will deepen our understanding of therapeutic  
296 spectrum of blocking TEAD-YAP activities. Therefore, we evaluated TM2 in colorectal cancer (CRC),  
297 as Hippo pathway has been shown to regulate the progression of CRC (Della Chiara et al., 2021; Jin et  
298 al., 2021; Pan et al., 2018). However, TM2 did not exhibit strong inhibition on cell proliferation of two  
299 CRC cell line (**Figure 4D**), HCT116 and DLD1. These results suggested suppression of Hippo  
300 transcriptional activities in CRC alone might not be sufficient to inhibit cell growth, as observed in  
301 mesothelioma. Indeed, YAP are found to be capable of rescuing cell viability in HCT116 with loss  
302 function of KRAS, implying KRAS signaling might also account for lack of potency of TM2 in CRC.  
303 Hence, we performed a drug combination matrix analysis across 5 doses of TM2 and 9 doses of MEK  
304 inhibitor trametinib in HCT116 and DLD1, respectively. Encouragingly, we observed strong inhibitory  
305 effects and substantial synergy in both of two cell lines (**Figure 4E and Figure 4-figure supplement 2**),

306 suggesting that combining TEAD inhibitors with other therapies might be a good strategy to broaden  
 307 their therapeutic applications in near future. Together, our data highlights that TM2 might have  
 308 appealing potentials to antagonize carcinogenesis driven by aberrant YAP activities.

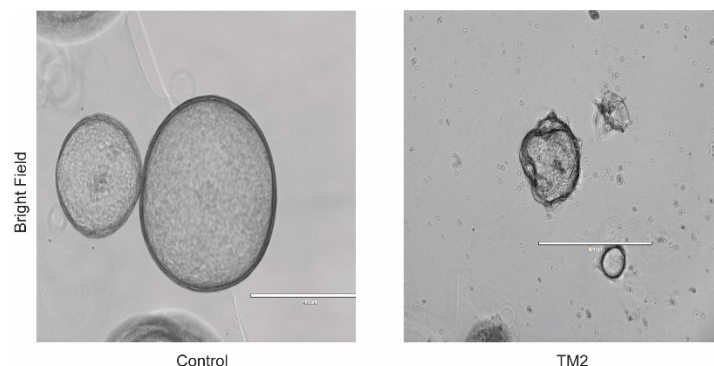

309

310 **Figure 4-figure supplement 1.** Bright field images of organoids treated with control or TM2 (40 nM).

311 Bar, 400  $\mu$ m.

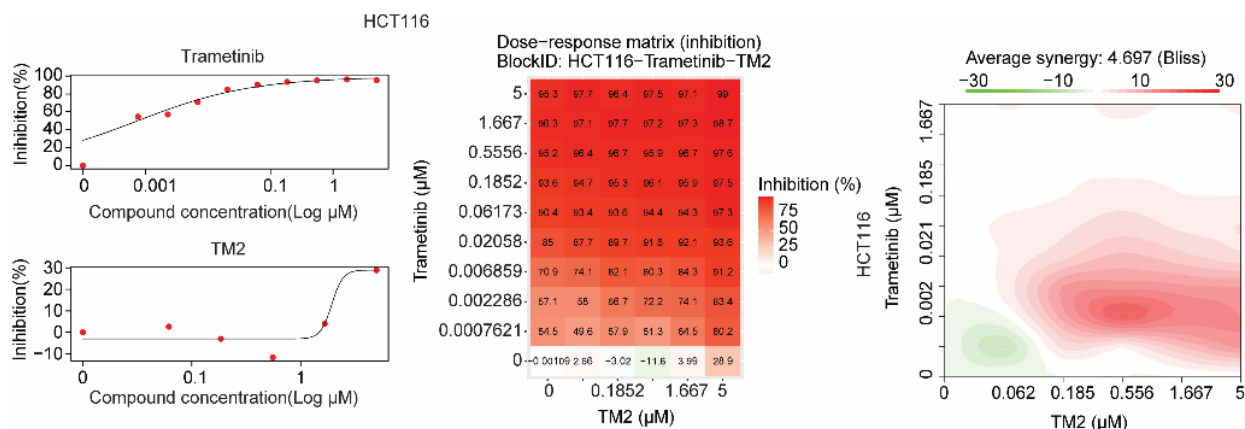

312

313 **Figure 4-figure supplement 2.** Drug combination experiments using TM2 and MEK inhibitor

314 Trametinib in HCT116: Heatmaps show color-coding as percentage of cell viability normalized to

315 untreated controls. Heatmaps of Bliss score for TM2 and Trametinib combination were shown.

## 316 Discussions

317 In this study, we discovered a new class of reversible pan-TEAD inhibitors. The most potent compound,

318 TM2, significantly diminished TEAD2/4 auto-palmitoylation in nanomolar ranges. Co-crystal structure

319 analysis of TM2 in complex with TEAD2 YBD discovered a novel binding mode. It showed that the

320 much more hydrophobic part of TM2, featured a cyclohexyl ring, exquisitely fits the palmitoylation  
321 pocket, which is the most well-known structure feature for targeting TEAD (Dey et al., 2020).  
322 Surprisingly, the structure demonstrates that the urea moiety of TM2, does not overlap with PLM, but  
323 sticks into a new and unique side pocket. This binding site is not occupied by all other known TEAD  
324 inhibitors, such as MGH-CP1, VT105 and K975. This side pocket is not fully available in the palmitate-  
325 bound TEAD2 structure, but is formed with significant side chain rearrangement upon TM2 binding.  
326 Moreover, this side pocket is endowed with higher hydrophilicity than the lipid-binding pocket,  
327 providing potentials for enhancing drug-like properties. The novel binding model expands structural  
328 diversity of the TEAD binding pocket and will boost the discovery of more novel chemotypes,  
329 contributing to the development of therapeutics targeting TEAD-YAP.

330 Blocking TEAD auto-palmitoylation by TM2 disrupted TEAD-YAP association. Consistently, we  
331 observed significant suppression of downstream Hippo transcription program with treatment of TM2.  
332 RNA-seq analysis further confirmed that TM2 specifically inhibits YAP transcriptional signatures.  
333 YAP/TAZ is constitutively active in many human malignancies and shown to be essential for many  
334 cancer hallmarks (Zanconato et al., 2016b). Therefore, targeting YAP/TAZ activities has been  
335 considered as an attractive strategy for cancer therapy. In human MPM, a type of tumor that is highly  
336 associated with YAP activation, TM2 showed striking anti-proliferation efficacy as a single agent, which  
337 is consistent with the fact that therapeutic effects of TEAD inhibitors are mainly limited to  
338 mesothelioma models (Kaneda et al., 2020; Tracy T Tang et al., 2021). In colorectal cancer HCT116 and  
339 DLD1, single treatment of TM2 was insufficient to inhibit their growth, although they are also reported  
340 to be dependent on YAP activities. This might be interpreted by the activation of other oncogenic  
341 signaling pathways in these cancers, including Ras-MAPK activations. Indeed, YAP has been shown to  
342 converge with KRAS and can rescue cell viability induced by KRAS suppression (Shao et al., 2014),  
343 suggesting inhibiting YAP activities might be also rescued by other oncogenes. Consistently, significant

344 synergy effects were observed when combining TM2 with a MEK inhibitor. These encouraging results  
345 suggested that rationalized combination of TEAD inhibitors with other inhibitors could significantly  
346 expand the utilities. In summary, our study disclosed TM2 as a promising new starting point for  
347 developing novel antitumor therapeutics against TEAD-YAP activities.

## 348 **Materials and methods**

### 349 **Inhibition of TEAD2 and TEAD4 auto-palmitoylation *In vitro***

350 Recombinant 6xHis-TEAD protein was treated with Compounds under indicated concentrations in 50  
351 mM MES buffer (PH 6.4) for 30 mins. After incubation with 1  $\mu$ M of alkyne palmitoyl-CoA (15968,  
352 Cayman) for 1 h, 50  $\mu$ L of sample mixture was treated with 5  $\mu$ L of freshly prepared “click” mixture  
353 containing 100  $\mu$ M TBTA (678937, Sigma-Aldrich), 1 mM TCEP (C4706, Sigma-Aldrich), 1 mM  
354  $\text{CuSO}_4$  (496130, Sigma-Aldrich), 100  $\mu$ M Biotin-Azide (1167-5, Click Chemistry Tools) and incubated  
355 for another 1 h. The samples were then added 11  $\mu$ L of 6xSDS loading buffer (BP-111R, Boston  
356 BioProducts) and denatured at 95°C for 5 mins. SDS-PAGE was used to analyze the samples.  
357 Palmitoylation signal was detected by streptavidin-HRP antibody (1:3000, S911, Invitrogen). The total  
358 protein level was detected by primary anti-His-tag antibody (1:10000, MA1-21315, Invitrogen) and  
359 secondary anti-mouse antibodies (1:5000, 7076S, Cell Signaling). The band intensities were quantified  
360 with ImageJ. The inhibition of auto-palmitoylation by compounds were normalized to DMSO. The IC<sub>50</sub>  
361 curves were plotted with GraphPad prism6.

### 362 **Cell culture**

363 Human H226, MSTO-211H, H2052, H28, HCT116, DLD1 cells were obtained from ATCC (Manassas,  
364 VA). HEK293A, HCT116, DLD1 cells were cultured in Dulbecco's modified Eagles media (DMEM)  
365 (Life Technologies) supplemented with 10% (v/v) fetal bovine serum (FBS) (Thermo/Hyclone,  
366 Waltham, MA), 100 units/mL penicillin and 100  $\mu$ g/mL streptomycin (Life technologies) at 37°C with

367 5% CO<sub>2</sub>. H226, MSTO-211H, H2052, H28 cells were cultured in RPMI 1640 medium (Life  
368 technologies) supplemented with 10% (v/v) fetal bovine serum (FBS) (Thermo/Hyclone, Waltham,  
369 MA), 100 units/mL penicillin, 100 µg/mL streptomycin (Life technologies), 2.5g/L glucose and 1mM  
370 sodium pyruvate at 37°C with 5% CO<sub>2</sub>.

### 371 **Transfection**

372 HEK293A cells was seed in 6 cm dishes overnight and transfected with plasmids using PEI reagent  
373 (1µg/µL). Briefly, PRK5-Myc-TEAD1 (33109, Addgene) and PEI were diluted in serum-free DMEM  
374 medium in two tubes (DNA: PEI ratio=1:2). After standing still for 5 mins, mix them well and stay for  
375 another 20 mins. The mixture was then added to dishes directly.

### 376 **Inhibition of TEAD palmitoylation in HEK293A cells**

377 HEK293A cells with or without TEAD overexpression was pretreated with DMSO or TM2 in medium  
378 with 10% dialyzed fetal bovine serum (DFBS) for 8 h and labeled by Alkynyl Palmitic acid (1165, Click  
379 Chemistry Tools) for another 16 h. The cells were then washed and harvested by cold DPBS (14190250,  
380 Life Technologies). The cell pellets were isolated by centrifugation (500 x g, 10 min) and lysed by TEA  
381 lysis buffer (50mM TEA-HCl, pH 7.4, 150 mM NaCl, 1% Triton X-100, 0.2% SDS, 1XProtease  
382 inhibitor-EDTA free cocktail (05892791001, Roche), phosphatase inhibitor cocktail (P0044, Sigma-  
383 Aldrich)) on ice for 30 mins. The protein concentration is determined using Bio-Rad assay and adjusted  
384 to 1 mg/mL. 100 µL of protein sample mixture was treated with 10 µL of freshly prepared “click”  
385 mixture containing 1 mM TBTA, 10 mM TCEP, 10 mM CuSO<sub>4</sub>, 1 mM TBTA Biotin-Azide and  
386 incubated for 1 h at room temperature. The proteins were precipitated by chloroform/methanol/H<sub>2</sub>O  
387 mixture and redissolved with 2%SDS in 0.1% PBST. The solution was diluted with 0.1% PBST and  
388 incubated with prewashed streptavidin agarose beads (69203-3, E M D MILLIPORE). After rotation at  
389 room temperature for 2 h, the beads were then pelleted by centrifugation (500 x g, 3 min) and washed  
390 with 0.2% SDS in PBS (3 x 1 mL). The bound proteins were eluted with a buffer containing 10 mM

391 EDTA pH 8.2 and 95% formamide and analyzed with SDS-PAGE. Anti-Myc (1:1000, 2278S, Cell  
392 Signaling) or anti-pan-TEAD (1:1000, 13295, Cell Signaling) antibody were used to detect Myc-  
393 TEAD1 or pan-TEAD, respectively. Secondary antibody was anti-rabbit (1:5000, 7074S, Cell  
394 Signaling).

### 395 **Protein purification, crystallization, and structure determination**

396 The recombinant human TEAD2 (residues 217–447, TEAD2 217–447) protein was purified and  
397 crystallized as described previously (Li et al., 2020b). Single crystals were soaked overnight at 20 °C  
398 with 5 mM TM2, 5% DMSO in reservoir solution supplemented with 25% glycerol and flashed-cooled  
399 in liquid nitrogen. Diffraction data was collected at beamline 19-ID (SBC-XSD) at the Advanced Pho-  
400 ton Source (Argonne National Laboratory) and processed with HKL3000 program (Otwinowski and  
401 Minor, 1997). Best crystals diffracted 2.40 Å and exhibited the symmetry of space group C2 with cell  
402 dimensions of  $a = 124.1$  Å,  $b = 62.3$  Å,  $c = 79.9$  Å and  $\beta = 117.7^\circ$ . Using TEAD2 structure (PDB ID:  
403 3L15) as searching model, initial density map and model were generated by molecular replacement with  
404 Phaser in PHENIX (Adams et al., 2010). There are two TEAD2 molecules in the asymmetric unit. One  
405 TM2 molecule was built in the cavity of each TEAD2 molecule, and the remaining residues were  
406 manually built in COOT39 and refined in PHENIX. The final model ( $R_{work} = 0.184$ ,  $R_{free} = 0.235$ )  
407 contains 400 residues, 30 water molecules and two TM2 molecules. Statistics for data collection and  
408 structure refinement are summarized in Table 1. The structure has been validated by wwPDB.40 Atomic  
409 coordinates and structure factors have been deposited to the Protein Data Bank under code 8CUH.  
410 Structural analysis and generation of graphics were carried out in PyMOL.

### 411 **Co-immunoprecipitation (Co-IP) assay**

412 H226 cells were treated with DMSO or TM2 for 24 h. The cells were then washed and harvested by  
413 cold DPBS. The cell pellets were isolated by centrifugation (500 x g, 10 min) and lysed by lysis buffer  
414 (50mM Tris-HCl pH 7.5, 10% Glycerol, 1% NP-40, 300mM NaCl, 150mM KCl, 5mM EDTA,

415 phosphatase inhibitor cocktail, complete EDTA-free protease inhibitors cocktail) on ice. After diluted  
416 with 50mM Tris-HCl pH 7.5, 10% Glycerol, 1% NP-40, 5mM EDTA, the protein samples were  
417 incubated with mouse anti-YAP antibody (sc-101199, Santa Cruz) overnight at 4°C and  
418 immunoprecipitated with prewashed protein A/G beads (P5030-1, UBPBio) for another 4 h at 4°C. The  
419 bound proteins were washed with 0.1% PBST for three times and eluted with 1xSDS loading buffer and  
420 analyzed with SDS-PAGE. Anti-TEAD1 (1:1000, 12292S, Cell Signaling), anti-pan-TEAD (1:1000,  
421 13295, Cell Signaling) or anti-YAP (1:1000, 140745, Cell Signaling) antibody were used to detect  
422 TEAD1, pan-TEAD or YAP, respectively. Secondary antibody was anti-rabbit (1:5000, 7074S, Cell  
423 Signaling).

#### 424 **Quantitative RT-PCR**

425 H226 cells were treated with DMSO or TM2 for 24 h and used to extract RNA using the RNeasy mini  
426 kit (74104, Qiagen). The high-capacity cDNA reverse transcription kit (4368814, Life Technologies)  
427 was employed to obtain cDNA. Target genes expression (*Cyr61*, *CTGF* and *ANKRD1*) was measured  
428 with PowerUp SYB Green Master Mix kit (A25777, Life Technologies). *β-actin* was used as reference  
429 gene. The primers are shown below:

|                 |         |                         |
|-----------------|---------|-------------------------|
| <i>hCyr61</i>   | Forward | GGAAAAGGCAGCTCACTGAAGC  |
|                 | Reverse | GGAGATACCAGTTCCACAGGTC  |
| <i>hCTGF</i>    | Forward | CTTGCGAAGCTGACCTGGAAGA  |
|                 | Reverse | CCGTCGGTACATACTCCACAGA  |
| <i>hANKRD1</i>  | Forward | CGACTCCTGATTATGTATGGCGC |
|                 | Reverse | GCTTTGGTTCCATTCTGCCAGTG |
| <i>hβ-actin</i> | Forward | CACCATTGGCAATGAGCGGTTC  |



Reverse

AGGTCTTTGCGGATGTCCACGT

#### 430 **RNA-seq analysis**

431 The NCI-H226 cells were treated with TM2 at 1  $\mu$ M for 24 hours. Total RNA was isolated with RNeasy  
432 Mini Kit (74104, Qiagen). The integrity of isolated RNA was analyzed using Bioanalyzer (Agilent  
433 Technologies). and the RNA-seq libraries were made by Novogene. All libraries have at least 50 million  
434 reads sequenced (150bp paired-end). The heatmap were generated using different expressed genes from  
435 TM2 treatment in NCI-H226 cells with Motpheus (<https://software.broadinstitute.org/morpheus/>).  
436 Principle component analysis (PCA) was determined by PCA function in M3C package in R. Gene Set  
437 Enrichment Analysis (GSEA) was performed using GSEA software from Broad Institute  
438 (<http://software.broadinstitute.org/gsea/index.jsp>). The YAP\_TAZ-TEAD Direct Target Genes set were  
439 generated with the published YAP/TAZ-TEAD target genes (Zanconato et al., 2015).

#### 440 **Cell proliferation assay**

441 H226, MSTO-211H, H2052, H28, HCT116 and DLD1 cells were seed at a concentration of 500-2000  
442 cells/well in 100  $\mu$ L of culture medium in 96 well plates overnight and treated compounds with 3-fold  
443 dilutions of concentrations from 10  $\mu$ M for 5~7 days. After removal of medium, each well was added 60  
444  $\mu$ L of MTT reagent (3-(4,5-dimethylthiazol-2-yl)-2,5-diphenyltetrazolium bromide) followed by  
445 incubation under 37°C for 4 h. The absorbance was measured by PerkinElmer EnVision plate reader.

#### 446 **Drug Combination**

447 The drug combination experiments were preformed using a drug combination matrix across 5 doses of  
448 TM2 (5  $\mu$ M, 3-fold dilution) and 9 doses of Trametinib (10  $\mu$ M, 3-fold dilution) in different tumor cell  
449 lines. Cell viability was determined at day 5 after the drugs administration by MTT. Drug synergy score  
450 was calculated followed Bliss rule. Synergy Score and Plot was generated by “Synergyfinder” package  
451 in R language.

## 452 **Organoids viability**

453 Mouse hepatic progenitor organoids (70932, STEMCELL Tech) were seeded in 96 well plate using 20ul  
454 Matrigel (Corning, #354230) and cultured in HepatiCult™ Organoid Growth Medium (06031,  
455 STEMCELL Tech) with or without TM2. Medium was replaced after every 48 h with fresh compound.  
456 Organoid viability was measured by PrestoBlue™ HS Cell Viability Reagent (ThermoFisher, # P50200)  
457 following the manufacturer's protocol.

## 458 **Immunofluorescence staining**

459 Organoids were plated in 8 well chamber slide and fixed in 4% paraformaldehyde at 4°C for 1h. After  
460 permeabilization in 0.5% PBST, organoids were blocked with 2% BSA for 2 h and incubated with  
461 primary antibody overnight at 40C. Imaging was performed on Nikon A1RHD25 confocal microscope.

## 462 **Statistics**

463 Data was analyzed by GraphPad prism6 and shown as mean  $\pm$  SEM. All the biochemical experiments  
464 are repeated for at least 3 times and shown by representative images. Two-tailed t-test was used for P  
465 value calculation.

## 466 **Synthesis of TEAD inhibitors**

467 All commercially available reagents were used without further purification. All solvents such as ethyl  
468 acetate, DMSO and Dichloromethane (DCM), were ordered from Fisher Scientific and Sigma-Aldrich  
469 and used as received. Unless otherwise stated, all reactions are conducted under air. Analytical thin-  
470 layer chromatography (TLC) plates from Sigma were used to monitor reactions. Flash column  
471 chromatography was employed for purification and performed on silica gel (230-400 mesh). <sup>1</sup>H NMR  
472 were recorded at 500 MHZ on JEOL spectrometer. <sup>13</sup>C NMR were recorded at 125 MHZ on JEOL  
473 spectrometer. The chemical shifts were determined with residual solvent as internal standard and  
474 reported in parts per million (ppm).

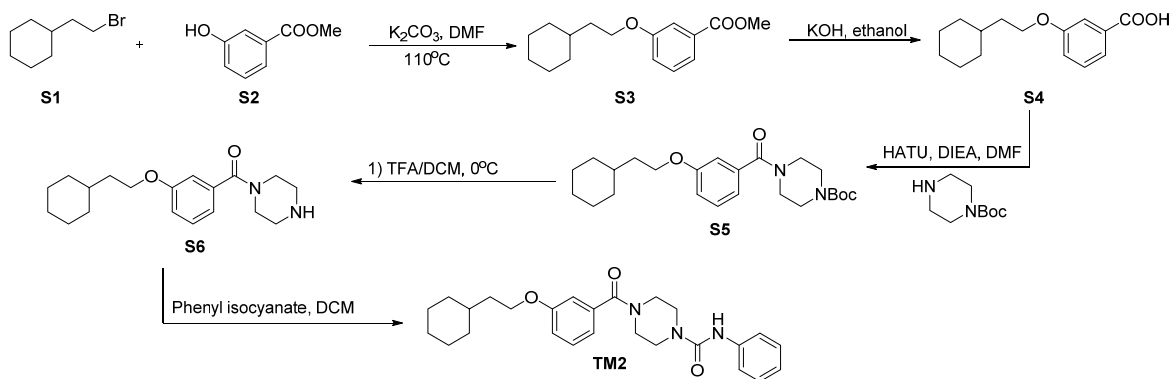

475

### 476 **Methyl 3-(2-cyclohexylethoxy)benzoate (S3)**

477 To a solution of methyl 3-hydroxybenzoate S2 (500 mg, 3.29 mmol) in DMF (7 mL) was added (2-  
478 bromoethyl)cyclohexane S1 (628.8 mg, 3.29 mmol) and  $K_2CO_3$  (628.1 mg, 4.94 mmol). The mixture  
479 was then stirred at 110°C for 4 h. After cooling to temperature, the reaction mixture was diluted with  
480 water and extracted with Ethyl acetate. The combined organic layer was washed with brine, dried over  
481  $Na_2SO_4$  and concentrated *in vacuo*. The crude residue was purified through silica gel chromatography to  
482 give S3 as colorless oil (780 mg, 90%).  $^1H$  NMR (500 MHz, Chloroform-*d*)  $\delta$  7.61 (d,  $J = 7.6$  Hz, 1H),  
483 7.55 (t,  $J = 2.1$  Hz, 1H), 7.33 (t,  $J = 7.9$  Hz, 1H), 7.09 (dd,  $J = 8.2, 2.6$  Hz, 1H), 4.03 (t,  $J = 6.7$  Hz, 2H),  
484 3.91 (s, 3H), 1.83–1.63 (m, 7H), 1.51 (ttt,  $J = 10.5, 6.8, 3.5$  Hz, 1H), 1.33–1.11 (m, 3H), 0.98 (qd,  $J =$   
485 11.9, 3.3 Hz, 2H).

### 486 **3-(2-Cyclohexylethoxy)benzoic acid (S4)**

487 To a solution of S3 (780 mg, 2.97 mmol) in ethanol (10 mL) was added saturated aqueous KOH (417  
488  $\mu$ L). The mixture was then stirred at room temperature overnight. After completion, the reaction was  
489 quenched with 1 N HCl on ice until PH was adjusted to 1. The mixture was then diluted with water and  
490 extracted with ethyl acetate. The combined organic layer was washed with brine, dried over anhydrous  
491  $Na_2SO_4$  and concentrated *in vacuo* to give S4 (650 mg, 88%) which were used directly without further  
492 purification.

### 493 **tert-Butyl 4-(3-(2-cyclohexylethoxy)benzoyl)piperazine-1-carboxylate (S5)**

494 To a solution of S4 (600 mg, 2.42 mmol) in DMF (20 mL) was added HATU (1.38 g, 3.63 mmol) and  
495 DIEA (862  $\mu$ L, 4.84 mmol). After stirred for 5 mins, the solution was then added *tert*-butyl piperazine-  
496 1-carboxylate (450.6 mg, 2.42 mmol) and continuously stirred at room temperature overnight. After  
497 completion, the reaction was quenched with water and extracted with ethyl acetate. The combined  
498 organic layer was washed with 1 N HCl, saturated NaHCO<sub>3</sub>, brine, dried over anhydrous Na<sub>2</sub>SO<sub>4</sub> and  
499 concentrated *in vacuo*. The crude residue was purified through silica gel chromatography to give S5 as a  
500 white solid (950 mg, 94%). <sup>1</sup>H NMR (500 MHz, Chloroform-*d*)  $\delta$  7.30 (t, *J* = 8.0 Hz, 1H), 6.96–6.89  
501 (m, 3H), 3.99 (t, *J* = 6.7 Hz, 2H), 3.82–3.31 (m, 8H), 1.79–1.62 (m, 7H), 1.54–1.39 (m, 1H) 1.47 (s,  
502 9H), 1.32–1.10 (m, 3H), 0.96 (qd, *J* = 11.9, 3.0 Hz, 2H).

### 503 **(3-(2-Cyclohexylethoxy)phenyl)(piperazin-1-yl)methanone (S6)**

504 To a solution of S5 (890 mg, 2.13 mmol) in DCM (4 mL) was added trifluoroacetic acid (4 mL)  
505 dropwise on ice. The mixture was continuously stirred on ice for 30 mins. After completion, the reaction  
506 was quenched with saturated NaHCO<sub>3</sub> dropwise on ice. The mixture was then diluted with water and  
507 extracted with ethyl acetate. The combined organic layer was washed with brine, dried over anhydrous  
508 Na<sub>2</sub>SO<sub>4</sub> and concentrated *in vacuo* to give S6 which were used directly without further purification.

### 509 **4-(3-(2-cyclohexylethoxy)benzoyl)-*N*-phenylpiperazine-1-carboxamide (TM2)**

510 To a solution of S6 (100 mg, 0.403 mmol) in DCM (4 mL) was added isocyanate phenyl isocyanate  
511 (63.1  $\mu$ L, 0.484 mmol). The reaction mixture was stirred at room temperature for 2 h. The reaction was  
512 quenched with water and extracted with DCM. The combined organic layer was washed with brine,  
513 dried over anhydrous Na<sub>2</sub>SO<sub>4</sub> and concentrated *in vacuo*. The crude residue was purified through silica  
514 gel chromatography to give TM2 as a white solid (160 mg, 91%). <sup>1</sup>H NMR (500 MHz, Chloroform-*d*)  $\delta$   
515 7.36–7.24 (m, 5H), 7.04 (t, *J* = 7.3 Hz, 1H), 6.98–6.89 (m, 3H), 6.77 (brs, 1H), 3.99 (t, *J* = 6.7 Hz, 2H),  
516 3.93–3.35 (m, 8H), 1.78–1.62 (m, 7H), 1.54–1.44 (m, 1H), 1.30–1.12 (m, 3H), 0.97 (qd, *J* = 12.1, 2.9  
517 Hz, 2H). <sup>13</sup>C NMR (125 MHz, Chloroform-*d*)  $\delta$  170.62, 159.45, 155.21, 138.85, 136.47, 129.85, 129.02,

518 123.55, 120.41, 118.87, 116.46, 113.17, 66.28, 47.46 (brs), 44.22, 42.01 (brs), 36.64, 34.61, 33.39,  
519 26.60, 26.33.

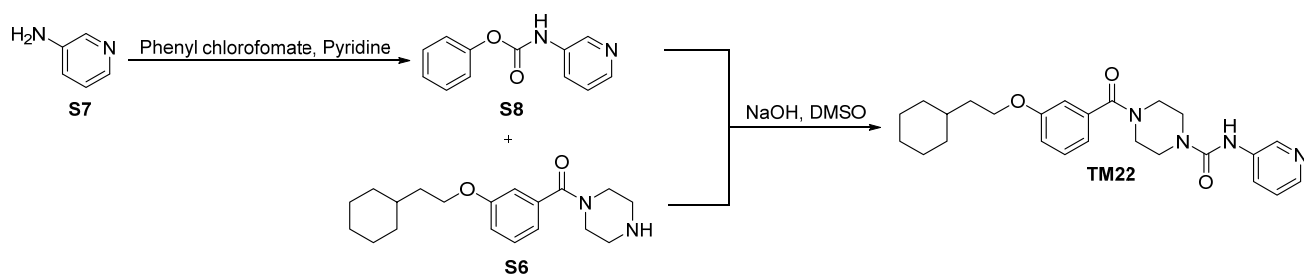

### 521 Phenyl pyridin-3-ylcarbamate (S8)

522 To a solution of Pyridin-3-amine S7 (188.2 mg, 2 mmol) in pyridine (5 mL) was added phenyl  
523 chloroformate (274  $\mu$ L, 2.2 mmol). The reaction mixture was stirred at room temperature overnight. The  
524 mixture was quenched by the addition of ethyl acetate and 10% critic acid. The organic layer was  
525 washed with saturated NaHCO<sub>3</sub>, brine, dried over Na<sub>2</sub>SO<sub>4</sub>. The organic solvents were removed in vacuo  
526 to give carbamate S8 which was used directly for the next step.

### 527 4-(3-(2-cyclohexylethoxy)benzoyl)-N-(pyridin-3-yl)piperazine-1-carboxamide (TM22)

528 To a solution of S6 (30 mg, 0.095 mmol) in DMSO (1 mL) was added carbamate (40.7 mg, 0.19 mmol)  
529 and NaOH (114  $\mu$ L, 0.114 mmol, 10 N). The reaction mixture was stirred at room temperature for 2 h.  
530 The reaction was quenched with water and extracted with ethyl acetate. The combined organic layer was  
531 washed with brine, dried over anhydrous Na<sub>2</sub>SO<sub>4</sub> and concentrated *in vacuo*. The crude residue was  
532 purified through silica gel chromatography to give TM22 as a white solid (36.1 mg, 87%). <sup>1</sup>H NMR  
533 (500 MHz, Chloroform-*d*)  $\delta$  8.46 (d, *J* = 2.6 Hz, 1H), 8.26 (dd, *J* = 4.8, 1.4 Hz, 1H), 7.96 (dt, *J* = 8.4,  
534 2.1 Hz, 1H), 7.34–7.20 (m, 3H), 6.99–6.87 (m, 3H), 3.99 (t, *J* = 6.7 Hz, 2H), 3.88–3.37 (m, 8H), 1.77–  
535 1.63 (m, 7H), 1.55–1.45 (m, 1H), 1.29–1.13 (m, 3H), 0.96 (qd, *J* = 12.0, 2.9 Hz, 2H). <sup>13</sup>C NMR (125  
536 MHz, Chloroform-*d*)  $\delta$  170.70, 159.50, 155.05, 144.25, 141.49, 136.36, 136.25, 129.93, 127.78, 123.78,  
537 118.82, 116.49, 113.21, 66.32, 47.43 (brs), 44.24, 42.00 (brs), 36.65, 34.64, 33.41, 26.62, 26.35.

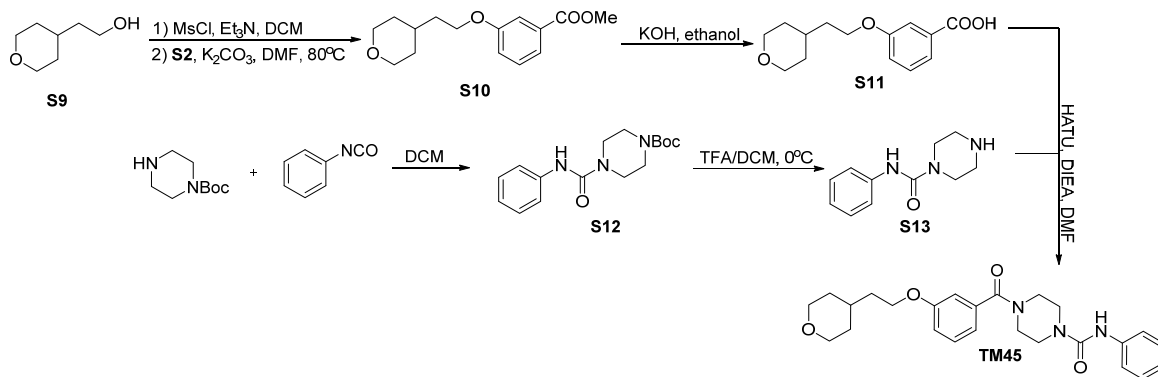

538

### 539 Methyl 3-(2-(tetrahydro-2H-pyran-4-yl)ethoxy)benzoate (S10)

540 To a solution of S9 (400 mg, 3.07 mmol) in anhydrous DCM (20 mL) was added Et<sub>3</sub>N (642 μL, 4.61  
541 mmol), MsCl (285 μL, 3.68 mmol) at 0°C. The solution was stirred at room temperature. After  
542 completion, the reaction mixture was diluted with water, extracted with DCM, washed with saturated  
543 aqueous NaHCO<sub>3</sub>. The combined organic layer was dried over anhydrous Na<sub>2</sub>SO<sub>4</sub> and concentrated *in*  
544 *vacuo* to give the methanesulfonate. The methanesulfonate was then dissolved in DMF (10 mL)  
545 followed by cautiously adding S2 (513.8 mg, 3.38 mmol) and K<sub>2</sub>CO<sub>3</sub> (848.6 mg, 6.14 mmol). The  
546 resulting suspension was further stirred at 80°C for 4 h. The reaction mixture was extracted with ethyl  
547 acetate, then washed with water, brine. The organic phase was dried over anhydrous Na<sub>2</sub>SO<sub>4</sub> and  
548 concentrated *in vacuo*. The crude residue was purified through silica gel chromatography to give S10 as  
549 colorless oil (680 mg, 84%). <sup>1</sup>H NMR (500 MHz, Chloroform-*d*) δ 7.62 (dd, *J* = 7.5, 1.3 Hz, 1H), 7.54  
550 (t, *J* = 2.1 Hz, 1H), 7.33 (t, *J* = 7.9 Hz, 1H), 7.08 (dd, *J* = 8.4, 2.6 Hz, 1H), 4.05 (t, *J* = 6.2 Hz, 2H), 3.97  
551 (ddd, *J* = 11.4, 4.5, 1.7 Hz, 2H), 3.91 (s, 3H), 3.41 (td, *J* = 11.8, 2.1 Hz, 2H), 1.85–1.73 (m, 3H), 1.67  
552 (dq, *J* = 13.3, 2.0 Hz, 2H), 1.37 (qd, *J* = 11.9, 4.4 Hz, 2H).

### 553 3-(2-(Tetrahydro-2H-pyran-4-yl)ethoxy)benzoic acid (S11)

554 S11 was prepared as described for S4 (670 mg, 2.53 mmol) from S10 and were used directly without  
555 further purification.

### 556 *tert*-Butyl 4-(phenylcarbamoyl)piperazine-1-carboxylate (S12)

557 S12 was prepared as described for TM2 from *tert*-butyl piperazine-1-carboxylate (1 g, 5.37 mmol) and  
558 phenyl isocyanate (767.5 mg, 6.44 mmol) as a white solid (quantitative). <sup>1</sup>H NMR (500 MHz,  
559 Chloroform-*d*)  $\delta$  7.35 (d, *J* = 7.6 Hz, 2H), 7.29 (td, *J* = 8.5, 8.0, 2.3 Hz, 2H), 7.08–7.02 (m, 1H), 6.37 (s,  
560 1H), 3.49 (s, 8H), 1.49 (s, 9H).

### 561 *N*-phenylpiperazine-1-carboxamide (S13)

562 S13 was prepared as described for S6 (800 mg, 2.62 mmol) from S12 and were used directly without  
563 further purification.

### 564 *N*-phenyl-4-(3-(2-(tetrahydro-2H-pyran-4-yl)ethoxy)benzoyl)piperazine-1-carboxamide (TM45)

565 TM45 was prepared as described for S5 from S11 (40 mg, 0.16 mmol) and S13 (39.4 mg, 0.192 mmol)  
566 as a white solid (44 mg, 63%). <sup>1</sup>H NMR (500 MHz, Chloroform-*d*)  $\delta$  7.35–7.29 (m, 3H), 7.29–7.24 (m,  
567 2H), 7.07–7.01 (m, 1H), 6.98–6.89 (m, 3H), 6.73 (s, 1H), 4.01 (t, *J* = 6.1 Hz, 2H), 3.96 (dd, *J* = 11.1,  
568 3.6, 2H), 3.86–3.43 (m, 8H), 3.39 (td, *J* = 11.8, 2.0 Hz, 2H), 1.81–1.71 (m, 3H), 1.68–1.61 (m, 2H),  
569 1.40–1.30 (m, 2H). <sup>13</sup>C NMR (125 MHz, Chloroform-*d*)  $\delta$  170.52, 159.30, 155.19, 138.85, 136.56,  
570 129.88, 129.01, 123.55, 120.37, 119.03, 116.40, 113.17, 68.06, 65.48, 47.43 (brs), 44.21, 42.01 (brs),  
571 36.15, 33.07, 32.01.

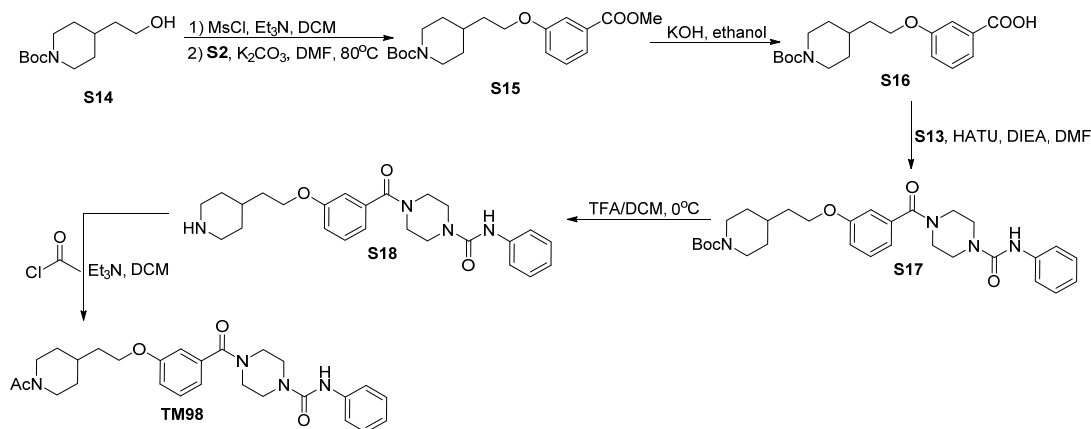

572

### 573 *tert*-Butyl 4-(2-(3-(methoxycarbonyl)phenoxy)ethyl)piperidine-1-carboxylate (S15)

574 S15 was prepared as described for S10 from S14 (480 mg, 2.09 mmol) and S12 (318 mg, 2.09 mmol) as  
575 a white solid (530 mg, 70%). <sup>1</sup>H NMR (500 MHz, Chloroform-*d*) δ 7.62 (dd, *J* = 7.7, 1.3 Hz, 1H), 7.54  
576 (dd, *J* = 2.7, 1.3 Hz, 1H), 7.33 (t, *J* = 7.9 Hz, 1H), 7.08 (ddd, *J* = 8.3, 2.6, 1.2 Hz, 1H), 4.19–4.05 (m,  
577 2H), 4.05 (t, *J* = 6.1 Hz, 2H), 3.91 (s, 3H), 2.80–2.64 (s, 2H), 1.80–1.65 (m, 5H), 1.46 (s, 9H), 1.23–1.11  
578 (m, 2H).

579 **3-(2-(1-(*tert*-Butoxycarbonyl)piperidin-4-yl)ethoxy)benzoic acid (S16)**

580 S16 was prepared as described for S4 from S15 (380 mg, 1.05 mmol) and were used directly without  
581 further purification.

582 ***tert*-Butyl 4-(2-(3-(4-(phenylcarbamoyl)piperazine-1-carbonyl)phenoxy)ethyl)piperidine-1-**  
583 **carboxylate (S17)**

584 S17 was prepared as described for S5 from S16 (200 mg, 0.572 mmol) and S13 (140.9 mg, 0.686 mmol)  
585 as a white solid (270 mg, 88%). <sup>1</sup>H NMR (500 MHz, Chloroform-*d*) δ 7.33 (t, *J* = 7.9 Hz, 3H), 7.30–  
586 7.24 (m, 2H), 7.03 (tt, *J* = 7.4, 1.3 Hz, 1H), 6.98–6.89 (m, 3H), 6.78 (brs, 1H), 4.16–4.04 (m, 2H), 4.00  
587 (t, *J* = 6.2 Hz, 2H), 3.87–3.35 (m, 8H), 2.70 (s, 2H), 1.82–1.64 (m, 5H), 1.45 (s, 9H), 1.21–1.11 (m, 2H).

588 ***N*-phenyl-4-(3-(2-(piperidin-4-yl)ethoxy)benzoyl)piperazine-1-carboxamide (S18)**

589 S18 was prepared as described for S6 from S17 (175mg, 0.33 mmol) and were used directly without  
590 further purification.

591 **4-(3-(2-(1-acetylpiperidin-4-yl)ethoxy)benzoyl)-*N*-phenylpiperazine-1-carboxamide (TM98)**

592 S18 (25 mg, 0.0573 mmol) was then dissolved in DCM (1.5 mL). The solution was added Et<sub>3</sub>N (16 μL,  
593 0.115 mmol) and acetyl chloride (4.9 μL, 0.0688 mmol) on ice. The reaction mixture was stirred at room  
594 temperature for 2 h. After completion, the reaction was quenched with saturated NaHCO<sub>3</sub> and extracted  
595 with ethyl acetate. The combined organic layer was washed with brine, dried over anhydrous Na<sub>2</sub>SO<sub>4</sub>  
596 and concentrated *in vacuo*. The crude residue was purified through silica gel chromatography to give



597 S18 as a colorless oil (20 mg, 73%).  $^1\text{H}$  NMR (500 MHz, Chloroform-*d*)  $\delta$  7.38–7.24 (m, 5H), 7.04 (t,  $J$   
598 = 7.3 Hz, 1H), 6.94 (ddt,  $J$  = 10.3, 6.1, 2.5 Hz, 3H), 6.86–6.75 (m, 1H), 4.60 (d,  $J$  = 13.1 Hz, 1H), 4.02  
599 (t,  $J$  = 5.9 Hz, 2H), 3.92–3.36 (m, 9H), 3.04 (t,  $J$  = 13.0 Hz, 1H), 2.54 (t,  $J$  = 13.0 Hz, 1H), 2.08 (s, 3H),  
600 1.84–1.71 (m, 5H), 1.27 – 1.10 (m, 2H).  $^{13}\text{C}$  NMR (125 MHz, Chloroform-*d*)  $\delta$  170.50, 168.98, 159.17,  
601 155.24, 138.92, 136.64, 129.92, 129.02, 123.52, 120.34, 119.17, 116.37, 113.28, 65.57, 46.77, 44.26,  
602 41.90, 35.57, 33.20, 32.78, 31.83, 21.61. HRMS (ESI): calcd for  $\text{C}_{27}\text{H}_{35}\text{N}_4\text{O}_4$   $[\text{M}+\text{H}]^+$ , 479.2658;  
603 found, 479.2653.

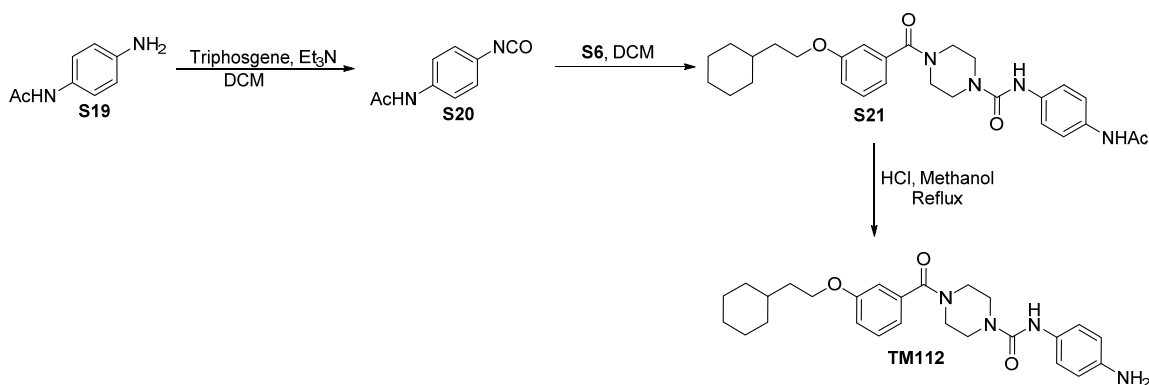

#### 605 ***N*-(4-isocyanatophenyl)acetamide (S20)**

606 To a solution of triphosgene (311.6 mg, 1.05 mmol) in DCM (6 mL) was added a solution of  $\text{Et}_3\text{N}$  (0.9  
607 mL, 6.45 mmol) and S19 (450.5 mg, 3 mmol) in DCM (6 mL) dropwise on ice. The mixture was  
608 continuously stirred at rt for 1h. The reaction was quenched with saturated  $\text{NaHCO}_3$  dropwise on ice.  
609 The mixture was then diluted with water and extracted with ethyl acetate. The combined organic layer  
610 was washed with brine, dried over anhydrous  $\text{Na}_2\text{SO}_4$  and concentrated in vacuo to give S20 which  
611 were used directly without further purification.

#### 612 ***N*-(4-Acetamidophenyl)-4-(3-(2-cyclohexylethoxy)benzoyl)piperazine-1-carboxamide (S21)**

613 S21 was prepared as described for TM2 from S6 (120 mg, 0.376 mmol) and *N*-(3-  
614 isocyanatophenyl)acetamide (79.5 mg, 0.451 mmol) as a white solid (100.5 mg, 54%).  $^1\text{H}$  NMR (500  
615 MHz, Chloroform-*d*)  $\delta$  7.40 (d,  $J$  = 8.4 Hz, 2H), 7.33–7.26 (m, 3H), 7.15 (brs, 1H), 6.98–6.89 (m, 3H),

616 6.39 (brs, 1H), 3.99 (t,  $J = 6.7$  Hz, 3H), 3.92–3.35 (m, 8H), 2.15 (s, 3H), 1.77–1.62 (m, 7H), 1.53–1.44  
617 (m, 1H), 1.29–1.10 (m, 3H), 1.01–0.90 (m, 2H).

618 ***N*-(4-aminophenyl)-4-(3-(2-cyclohexylethoxy)benzoyl)piperazine-1-carboxamide (TM112)**

619 To a solution of S21 (80 mg, 0.161 mmol) in methanol (2 mL) was added 2 N HCl (4 mL). The reaction  
620 was refluxed for 2 h. After cooling down to rt, the reaction mixture was basified with saturated NaHCO<sub>3</sub>  
621 on ice and extracted with ethyl acetate. The combined organic layer was washed with brine, dried over  
622 anhydrous Na<sub>2</sub>SO<sub>4</sub> and concentrated *in vacuo*. The crude residue was purified through silica gel  
623 chromatography to give TM112 as colorless oil (23.8 mg, 33%). <sup>1</sup>H NMR (500 MHz, Chloroform-*d*)  $\delta$   
624 7.31 (t,  $J = 8.0$  Hz, 1H), 7.09 (d,  $J = 8.6$  Hz, 2H), 6.98–6.90 (m, 3H), 6.63 (d,  $J = 8.6$  Hz, 2H), 6.23 (s,  
625 1H), 4.00 (t,  $J = 6.7$  Hz, 2H), 3.93–3.26 (m, 10H), 1.78–1.64 (m, 7H), 1.55–1.45 (m, 1H), 1.31–1.15 (m,  
626 3H), 0.97 (qd,  $J = 12.1, 3.0$  Hz, 2H). <sup>13</sup>C NMR (125 MHz, Chloroform-*d*)  $\delta$  170.63, 159.47, 155.85,  
627 143.21, 136.61, 129.85, 129.80, 123.29, 118.97, 116.49, 115.70, 113.21, 66.32, 44.26, 36.68, 34.66,  
628 33.42, 26.64, 26.37.

629 **Acknowledgement**

630

631 **Additional information**

632 **Funding Sources**

633 The high throughput screen to identify TM2 series of compounds is supported by a sponsored research  
634 agreement with Astellas Innovation fund, and carried out with Astellas non-proprietary compound  
635 collections. We thank NIH fundings for the support (XW. JM and XL). Hu Lu is partly supported by a  
636 postdoc fellowship from antidote foundation for cancers. We thank Ms. Qian Xu for technical assistance  
637 of cloning and RT-PCR experiments.

638 **Competing interest**

639 H. L and X. W. are inventors of a patent application covering TM2 and analogues as novel TEAD  
640 inhibitors. Dr. Xu Wu has a financial interest in Tasca Therapeutics, which is developing small molecule  
641 modulators of TEAD palmitoylation and transcription factors. Dr. Wu's interests were reviewed and are  
642 managed by Mass General Hospital, and Mass General Brigham in accordance with their conflict of  
643 interest policies.

#### 644 **Author contributions**

645 Lu Hu, Conceptualization, Data Curation, Formal analysis, Investigation, Writing—original draft,  
646 Writing—review and editing; Sun Yang, Data Curation, Formal analysis, Investigation, Writing—review  
647 and editing; Shun Liu, Data Curation, Formal analysis, Investigation; Hannah Erb, Data Curation,  
648 Formal analysis, Investigation; Xuelian Luo, Supervision, Formal analysis, Writing—review and  
649 editing; Xu Wu, Conceptualization, Supervision, Resources, Funding acquisition, Formal analysis,  
650 Writing—original draft, Writing—review and editing.

#### 651 **Additional files**

#### 652 **Data availability**

653 The crystal structure of TEAD2 YBD in complex with TM2 has been deposited in the Protein Data  
654 Bank with accession codes 8CUH. The raw RNA-seq data of H226 treated with TM2 has been  
655 deposited in NCBI GEO DataSets and is accessible at  
656 <https://www.ncbi.nlm.nih.gov/geo/query/acc.cgi?acc=GSE203421>.

657 The following dataset was generated:

| Authors                | Year | Dataset title              | Dataset URL                                                                                                       | Database and Identifier      |
|------------------------|------|----------------------------|-------------------------------------------------------------------------------------------------------------------|------------------------------|
| Xu Wu, Yang Sun, Lu Hu | 2022 | Next Generation Sequencing | <a href="https://www.ncbi.nlm.nih.gov/geo/query/acc.cgi?ac">https://www.ncbi.nlm.nih.gov/geo/query/acc.cgi?ac</a> | NCBI GEO DataSets, GSE203421 |

|  |  |                                                                                           |             |  |
|--|--|-------------------------------------------------------------------------------------------|-------------|--|
|  |  | Quantitative Analysis<br>of TEAD<br>Palmitoylation<br>Inhibitor TM2 in NCI-<br>H226 cells | c=GSE203421 |  |
|--|--|-------------------------------------------------------------------------------------------|-------------|--|

658

659 The following previously published dataset was used:

| Author(s)                                                                                                                                                                    | Year | Dataset title                                                                                           | Dataset URL                                                                                                                             | Database and Identifier         |
|------------------------------------------------------------------------------------------------------------------------------------------------------------------------------|------|---------------------------------------------------------------------------------------------------------|-----------------------------------------------------------------------------------------------------------------------------------------|---------------------------------|
| Calvet L, Dos-Santos O,<br>Spanakis E, Valence S,<br>Jean-Baptiste V, Le Bail<br>J, Buzy A, Paul P, Henry<br>C, Pollard J, Sidhu S,<br>Moll J, Debussche L,<br>Valtingojer I | 2022 | Human malignant<br>mesothelioma NCI-<br>H226 cells treated<br>with TEAD inhibitor<br>K-975 in SCID mice | <a href="https://www.ncbi.nlm.nih.gov/geo/query/acc.cgi?acc=GSE196726">https://www.ncbi.nlm.nih.gov/geo/query/acc.cgi?acc=GSE196726</a> | NCBI GEO DataSets,<br>GSE196726 |

660

## 661 References

- 662 Adams PD, Afonine P V., Bunkóczi G, Chen VB, Davis IW, Echols N, Headd JJ, Hung LW, Kapral GJ,  
663 Grosse-Kunstleve RW, McCoy AJ, Moriarty NW, Oeffner R, Read RJ, Richardson DC,  
664 Richardson JS, Terwilliger TC, Zwart PH. 2010. PHENIX: A comprehensive Python-based system  
665 for macromolecular structure solution. *Acta Crystallogr Sect D Biol Crystallogr* **66**:213–221.  
666 doi:10.1107/S09074444909052925
- 667 Bum-Erdene K, Zhou D, Gonzalez-Gutierrez G, Ghazayel MK, Si Y, Xu D, Shannon HE, Bailey BJ,  
668 Corson TW, Pollok KE, Wells CD, Meroueh SO. 2019. Small-Molecule Covalent Modification of

- 669 Conserved Cysteine Leads to Allosteric Inhibition of the TEAD·Yap Protein-Protein Interaction.  
670 *Cell Chem Biol* **26**:378-389.e13. doi:10.1016/j.chembiol.2018.11.010
- 671 Chan P, Han X, Zheng B, Deran M, Yu J, Jarugumilli GK, Deng H, Pan D, Luo X, Wu X. 2016.  
672 Autopalmitoylation of TEAD proteins regulates transcriptional output of the Hippo pathway. *Nat*  
673 *Chem Biol* **12**:282–289. doi:10.1038/nchembio.2036
- 674 Della Chiara G, Gervasoni F, Fakiola M, Godano C, D’Oria C, Azzolin L, Bonnal RJP, Moreni G,  
675 Drufuca L, Rossetti G, Ranzani V, Bason R, De Simone M, Panariello F, Ferrari I, Fabbris T,  
676 Zanconato F, Forcato M, Romano O, Caroli J, Gruarin P, Sarnicola ML, Cordenonsi M, Bardelli A,  
677 Zucchini N, Ceretti AP, Mariani NM, Cassingena A, Sartore-Bianchi A, Testa G, Gianotti L,  
678 Opocher E, Pisati F, Tripodo C, Macino G, Siena S, Bicciato S, Piccolo S, Pagani M. 2021.  
679 Epigenomic landscape of human colorectal cancer unveils an aberrant core of pan-cancer  
680 enhancers orchestrated by YAP/TAZ. *Nat Commun* **12**. doi:10.1038/s41467-021-22544-y
- 681 Dey A, Varelas X, Guan KL. 2020. Targeting the Hippo pathway in cancer, fibrosis, wound healing and  
682 regenerative medicine. *Nat Rev Drug Discov* **19**:480–494. doi:10.1038/s41573-020-0070-z
- 683 Harvey KF, Zhang X, Thomas DM. 2013. The Hippo pathway and human cancer. *Nat Rev Cancer*  
684 **13**:246–257. doi:10.1038/nrc3458
- 685 Holden JK, Crawford JJ, Noland CL, Schmidt S, Zbieg JR, Lacap JA, Zang R, Miller GM, Zhang Y,  
686 Beroza P, Reja R, Lee W, Tom JYK, Fong R, Steffek M, Clausen S, Hagenbeek TJ, Hu T, Zhou Z,  
687 Shen HC, Cunningham CN. 2020. Small Molecule Dysregulation of TEAD Lipidation Induces a  
688 Dominant-Negative Inhibition of Hippo Pathway Signaling. *Cell Rep* **31**:107809.  
689 doi:10.1016/j.celrep.2020.107809
- 690 Holden JK, Cunningham CN. 2018. Targeting the hippo pathway and cancer through the TEAD family  
691 of transcription factors. *Cancers (Basel)*. doi:10.3390/cancers10030081

- 692 Jiao S, Wang H, Shi Z, Dong A, Zhang W, Song X, He F, Wang Y, Zhang Z, Wang W, Wang X, Guo T,  
693 Li P, Zhao Y, Ji H, Zhang L, Zhou Z. 2014. A Peptide Mimicking VGLL4 Function Acts as a YAP  
694 Antagonist Therapy against Gastric Cancer. *Cancer Cell* **25**:166–180.  
695 doi:10.1016/j.ccr.2014.01.010
- 696 Jin L, Chen Y, Cheng D, He Z, Shi X, Du B, Xi X, Gao Y, Guo Y. 2021. YAP inhibits autophagy and  
697 promotes progression of colorectal cancer via upregulating Bcl-2 expression. *Cell Death Dis* **12**.  
698 doi:10.1038/s41419-021-03722-8
- 699 Johnson R, Halder G. 2014. The two faces of Hippo: Targeting the Hippo pathway for regenerative  
700 medicine and cancer treatment. *Nat Rev Drug Discov*. doi:10.1038/nrd4161
- 701 Kaneda A, Seike T, Danjo T, Nakajima T, Otsubo N, Yamaguchi D, Tsuji Y, Hamaguchi K, Yasunaga  
702 M, Nishiya Y, Suzuki M, Saito J-I, Yatsunami R, Nakamura S, Sekido Y, Mori K. 2020. The novel  
703 potent TEAD inhibitor, K-975, inhibits YAP1/TAZ-TEAD protein-protein interactions and exerts  
704 an anti-tumor effect on malignant pleural mesothelioma. *Am J Cancer Res* **10**:4399–4415.
- 705 Kurppa KJ, Liu Y, To C, Zhang T, Fan M, Vajdi A, Knelson EH, Xie Y, Lim K, Cejas P, Portell A,  
706 Lizotte PH, Ficarro SB, Li S, Chen T, Haikala HM, Wang H, Bahcall M, Gao Y, Shalhout S,  
707 Boettcher S, Shin BH, Thai T, Wilkens MK, Tillgren ML, Mushajiang M, Xu M, Choi J, Bertram  
708 AA, Ebert BL, Beroukhim R, Bandopadhyay P, Awad MM, Gokhale PC, Kirschmeier PT, Marto  
709 JA, Camargo FD, Haq R, Paweletz CP, Wong KK, Barbie DA, Long HW, Gray NS, Jänne PA.  
710 2020. Treatment-Induced Tumor Dormancy through YAP-Mediated Transcriptional  
711 Reprogramming of the Apoptotic Pathway. *Cancer Cell* **37**:104-122.e12.  
712 doi:10.1016/j.ccell.2019.12.006
- 713 Lanyon-Hogg T, Masumoto N, Bodakh G, Konitsiotis AD, Thinon E, Rodgers UR, Owens RJ, Magee  
714 AI, Tate EW. 2015. Click chemistry armed enzyme-linked immunosorbent assay to measure

- 715 palmitoylation by hedgehog acyltransferase. *Anal Biochem* **490**:66–72.
- 716 doi:10.1016/j.ab.2015.08.025
- 717 Li Q, Sun Y, Jarugumilli GK, Liu S, Dang K, Cotton JL, Xioli J, Chan PY, DeRan M, Ma L, Li R, Zhu  
718 LJ, Li JH, Leiter AB, Ip YT, Camargo FD, Luo X, Johnson RL, Wu X, Mao J. 2020a. Lats1/2  
719 Sustain Intestinal Stem Cells and Wnt Activation through TEAD-Dependent and Independent  
720 Transcription. *Cell Stem Cell* **26**:675–692. doi:10.1016/j.stem.2020.03.002
- 721 Li Q, Sun Y, Jarugumilli GK, Liu S, Dang K, Cotton JL, Xioli J, Chan PY, DeRan M, Ma L, Li R, Zhu  
722 LJ, Li JH, Leiter AB, Ip YT, Camargo FD, Luo X, Johnson RL, Wu X, Mao J. 2020b. Lats1/2  
723 Sustain Intestinal Stem Cells and Wnt Activation through TEAD-Dependent and Independent  
724 Transcription. *Cell Stem Cell* **0**:1–18. doi:10.1016/j.stem.2020.03.002
- 725 Lin KC, Moroishi T, Meng Z, Jeong HS, Plouffe SW, Sekido Y, Han J, Park HW, Guan KL. 2017.  
726 Regulation of Hippo pathway transcription factor TEAD by p38 MAPK-induced cytoplasmic  
727 translocation. *Nat Cell Biol* **19**:996–1002. doi:10.1038/ncb3581
- 728 Lu W, Wang J, Li Y, Tao H, Xiong H, Lian F, Gao J, Ma H, Lu T, Zhang D, Ye X, Ding H, Yue L,  
729 Zhang Y, Tang H, Zhang N, Yang Y, Jiang H, Chen K, Zhou B, Luo C. 2019. Discovery and  
730 biological evaluation of vinylsulfonamide derivatives as highly potent, covalent TEAD  
731 autopalmitoylation inhibitors. *Eur J Med Chem* **184**:111767. doi:10.1016/j.ejmech.2019.111767
- 732 Miyanaga A, Masuda M, Tsuta K, Kawasaki K, Nakamura Y, Sakuma T, Asamura H, Gemma A,  
733 Yamada T. 2015. Hippo pathway gene mutations in malignant mesothelioma: Revealed by RNA  
734 and targeted exon sequencing. *J Thorac Oncol* **10**:844–851. doi:10.1097/JTO.0000000000000493
- 735 Moroishi T, Hansen CG, Guan KL. 2015. The emerging roles of YAP and TAZ in cancer. *Nat Rev*  
736 *Cancer* **15**:73–79. doi:10.1038/nrc3876
- 737 Murakami H, Mizuno T, Taniguchi T, Fujii M, Ishiguro F, Fukui T, Akatsuka S, Horio Y, Hida T,

- 738 Kondo Y, Toyokuni S, Osada H, Sekido Y. 2011. LATS2 is a tumor suppressor gene of malignant  
739 mesothelioma. *Cancer Res* **71**:873–883. doi:10.1158/0008-5472.CAN-10-2164
- 740 Nicolini F, Bocchini M, Bronte G, Delmonte A, Guidoboni M, Crinò L, Mazza M. 2020. Malignant  
741 Pleural Mesothelioma: State-of-the-Art on Current Therapies and Promises for the Future. *Front*  
742 *Oncol* **9**. doi:10.3389/fonc.2019.01519
- 743 Noland CL, Gierke S, Schnier PD, Murray J, Sandoval WN, Sagolla M, Dey A, Hannoush RN,  
744 Fairbrother WJ, Cunningham CN. 2016. Palmitoylation of TEAD Transcription Factors Is  
745 Required for Their Stability and Function in Hippo Pathway Signaling. *Structure* **24**:179–186.  
746 doi:10.1016/j.str.2015.11.005
- 747 Otwinowski Z, Minor W. 1997. Processing of X-ray diffraction data collected in oscillation mode.  
748 *Methods Enzymol* **276**:307–326. doi:10.1016/S0076-6879(97)76066-X
- 749 Pan D. 2010. The hippo signaling pathway in development and cancer. *Dev Cell* **19**:491–505.  
750 doi:10.1016/j.devcel.2010.09.011
- 751 Pan D. 2007. Hippo signaling in organ size control. *Genes Dev*. doi:10.1101/gad.1536007
- 752 Pan Y, Tong JHM, Lung RWM, Kang W, Kwan JSH, Chak WP, Tin KY, Chung LY, Wu F, Ng SSM,  
753 Mak TWC, Yu J, Lo KW, Chan AWH, To KF. 2018. RASAL2 promotes tumor progression  
754 through LATS2/YAP1 axis of hippo signaling pathway in colorectal cancer. *Mol Cancer* **17**:1–14.  
755 doi:10.1186/s12943-018-0853-6
- 756 Planas-Paz L, Sun T, Pikiolak M, Cochran NR, Bergling S, Orsini V, Yang Z, Sigoillot F, Jetzer J, Syed  
757 M, Neri M, Schuierer S, Morelli L, Hoppe PS, Schwarzer W, Cobos CM, Alford JL, Zhang L,  
758 Cuttat R, Waldt A, Carballido-Perrig N, Nigsch F, Kinzel B, Nicholson TB, Yang Y, Mao X,  
759 Terracciano LM, Russ C, Reece-Hoyes JS, Gubser Keller C, Sailer AW, Bouwmeester T,  
760 Greenbaum LE, Lugus JJ, Cong F, McAllister G, Hoffman GR, Roma G, Tchorz JS. 2019. YAP,



- 761 but Not RSPO-LGR4/5, Signaling in Biliary Epithelial Cells Promotes a Ductular Reaction in  
762 Response to Liver Injury. *Cell Stem Cell* **25**:39-53.e10. doi:10.1016/j.stem.2019.04.005
- 763 Pobbati A V., Han X, Hung AW, Weiguang S, Huda N, Chen GY, Kang CB, Chia CSB, Luo X, Hong  
764 W, Poulsen A. 2015. Targeting the Central Pocket in Human Transcription Factor TEAD as a  
765 Potential Cancer Therapeutic Strategy. *Structure* **23**:2076–2086. doi:10.1016/j.str.2015.09.009
- 766 Pobbati A V., Hong W. 2020. A combat with the YAP/TAZ-TEAD oncoproteins for cancer therapy.  
767 *Theranostics* **10**:3622–3635. doi:10.7150/thno.40889
- 768 Pobbati A V., Hong W. 2013. Emerging roles of TEAD transcription factors and its coactivators in  
769 cancers. *Cancer Biol Ther* **14**:390–398. doi:10.4161/cbt.23788
- 770 Rossini M, Rizzo P, Bononi I, Clementz A, Ferrari R, Martini F, Tognon MG. 2018. New perspectives  
771 on diagnosis and therapy of malignant pleural mesothelioma. *Front Oncol* **8**.  
772 doi:10.3389/fonc.2018.00091
- 773 Sekido Y. 2018. Targeting the Hippo pathway is a new potential therapeutic modality for malignant  
774 mesothelioma. *Cancers (Basel)* **10**:1–22. doi:10.3390/cancers10040090
- 775 Shao DD, Xue W, Krall EB, Bhutkar A, Piccioni F, Wang X, Schinzel AC, Sood S, Rosenbluh J, Kim  
776 JW, Zwang Y, Roberts TM, Root DE, Jacks T, Hahn WC. 2014. KRAS and YAP1 converge to  
777 regulate EMT and tumor survival. *Cell* **158**:171–184. doi:10.1016/j.cell.2014.06.004
- 778 Tanaka I, Osada H, Fujii M, Fukatsu A, Hida T, Horio Y, Kondo Y, Sato A, Hasegawa Y, Tsujimura T,  
779 Sekido Y. 2013. LIM-domain protein AJUBA suppresses malignant mesothelioma cell  
780 proliferation via Hippo signaling cascade. *Oncogene* **34**:73–83. doi:10.1038/onc.2013.528
- 781 Tang Tracy T, Konradi AW, Feng Y, Peng X, Ma M, Li J, Yu F-X, Guan K-L, Post L. 2021. Small  
782 Molecule Inhibitors of TEAD Auto-palmitoylation Selectively Inhibit Proliferation and Tumor  
783 Growth of NF2-deficient Mesothelioma. *Mol Cancer Ther* molcanther.0717.2020.

- 784       doi:10.1158/1535-7163.mct-20-0717
- 785   Tang Tracy T., Konradi AW, Feng Y, Peng X, Ma M, Li J, Yu FX, Guan KL, Post L. 2021. Small  
786       molecule inhibitors of TEAD auto-palmitoylation selectively inhibit proliferation and tumor  
787       growth of NF2-deficient mesothelioma. *Mol Cancer Ther* **20**:986–998. doi:10.1158/1535-  
788       7163.MCT-20-0717
- 789   Waring MJ. 2010. Lipophilicity in drug discovery. *Expert Opin Drug Discov* **5**:235–248.  
790       doi:10.1517/17460441003605098
- 791   Wu S, Liu Y, Zheng Y, Dong J, Pan D. 2008. The TEAD/TEF family protein Scalloped mediates  
792       transcriptional output of the Hippo growth-regulatory pathway. *Dev Cell* **14**:388–398.  
793       doi:10.1016/j.devcel.2008.01.007
- 794   Yu FX, Zhao B, Guan KL. 2015. Hippo Pathway in Organ Size Control, Tissue Homeostasis, and  
795       Cancer. *Cell* **163**:811–828. doi:10.1016/j.cell.2015.10.044
- 796   Zanconato F, Battilana G, Cordenonsi M, Piccolo S. 2016a. YAP/TAZ as therapeutic targets in cancer.  
797       *Curr Opin Pharmacol* **29**:26–33. doi:10.1016/j.coph.2016.05.002
- 798   Zanconato F, Cordenonsi M, Piccolo S. 2016b. YAP/TAZ at the Roots of Cancer. *Cancer Cell* **29**:783–  
799       803. doi:10.1016/j.ccell.2016.05.005
- 800   Zanconato F, Forcato M, Battilana G, Azzolin L, Quaranta E, Bodega B, Rosato A, Bicciato S,  
801       Cordenonsi M, Piccolo S. 2015. Genome-wide association between YAP/TAZ/TEAD and AP-1 at  
802       enhancers drives oncogenic growth. *Nat Cell Biol* **17**:1218–1227. doi:10.1038/ncb3216
- 803   Zhang Zhisen, Lin Z, Zhou Z, Shen HC, Yan SF, Mayweg A V., Xu Z, Qin N, Wong JC, Zhang  
804       Zhenshan, Rong Y, Fry DC, Hu T. 2014. Structure-based design and synthesis of potent cyclic  
805       peptides inhibiting the YAP-TEAD protein-protein interaction. *ACS Med Chem Lett* **5**:993–998.  
806       doi:10.1021/ml500160m

- 807 Zhao B, Ye X, Yu Jindan, Li L, Li W, Li S, Yu Jianjun, Lin JD, Wang CY, Chinnaiyan AM, Lai ZC,  
808 Guan KL. 2008. TEAD mediates YAP-dependent gene induction and growth control. *Genes Dev.*  
809 doi:10.1101/gad.1664408
- 810 Zhou Z, Hu T, Xu Z, Lin Z, Zhang Z, Feng T, Zhu L, Rong Y, Shen H, Luk JM, Zhang X, Qin N. 2015.  
811 Targeting Hippo pathway by specific interruption of YAP-TEAD interaction using cyclic YAP-like  
812 peptides. *FASEB J* **29**:724–732. doi:10.1096/fj.14-262980
- 813
